# Supplementary material for: The genetic risk of gestational diabetes in South Asian women
Source: eLife. 2022 Nov 22;11:e81498. doi: 10.7554/eLife.81498 (PMC9683781; doi:10.7554/eLife.81498)
Supplement: Supplementary file 1. — (a) Information on the variants included in the polygenic risk score. Genomic positions corresponds to GRCh37/hg19 assembly. SNV IDs, alleles, ORs and P-values are from Mahajan et al., 2014 (Main text reference 30). Abbreviations: CI, confidence interval; OR, odds ratio; PRS, polygenic risk score. (b) Association results between PRS and GDM-related variables in START and BiB (Univariate models). a Values are Betas for continuous variables (fasting 2 h, and AUC glucose), and ORs for binary variable (i.e. GDM). Abbreviations: BiB, Born in Bradford; CI, confidence interval; IADPSG, International association of the diabetes and pregnancy study groups; OR, odds ratio; PRS, polygenic risk score; QE P, P-value from the test for (residual) heterogeneity; SE, standard error; START, South Asian birth cohort; T1, tertile 1; T2, tertile 2; T3, tertile3. (c) Association between GDM risk factors and GDM (South Asian-specific definition): results from multivariate models in START and BiB cohorts. Models were additionally adjusted for the first 5 PCs of each study. a Values are Betas for continuous variables (fasting 2 h, and AUC glucose), and ORs for binary variable (i.e. GDM). Abbreviations: BiB, Born in Bradford; BMI, Body mass index; CI, Confidence interval; GDM, Gestational diabetes mellitus; OR, Odds ratio; SA, South Asia; SD, Standard deviation; QE P, P-value from the test for (residual) heterogeneity; START, South Asian birth cohort; T2D, Type 2 diabetes. (d) Association between categorical PRS (tertiles) and GDM-related traits in multivariate models. The table shows results for tertile 2 vs. tertile 1, and tertile 3 vs. tertile 1 a Values are Betas for continuous variables (fasting 2 h, and AUC glucose), and ORs for binary variables (i.e. GDM). Abbreviations: BiB, Born in Bradford; CI, confidence interval; IADPSG, International association of the diabetes and pregnancy study groups; OR, odds ratio; PRS, polygenic risk score; QE P, P-value from the test for (residual) heter [file elife-81498-supp1.xlsx]

## Sheet: Supl File 1a
SNV ID	Chromosome	Position	Risk Allele	Other Allele	OR[95%CI]	P
rs3856168	1	4116604	T	C	1.08 [1.03-1.12]	0.0004
rs2275527	1	11190646	G	A	1.05 [1.02-1.09]	0.00085
rs1010447	1	11269796	C	T	1.05 [1.02-1.09]	0.00077
rs7526649	1	11278163	T	C	1.05 [1.02-1.08]	0.0011
rs7537478	1	14192950	C	T	1.08 [1.03-1.12]	0.0014
rs16851970	1	16044401	A	G	1.07 [1.03-1.11]	0.0012
rs2501776	1	17619279	C	T	1.06 [1.02-1.1]	0.00087
rs16862362	1	19238908	C	T	1.24 [1.09-1.41]	0.0014
rs912813	1	20728889	T	A	1.04 [1.02-1.07]	0.00078
rs10916784	1	20729451	G	C	1.05 [1.02-1.07]	0.00068
rs10916786	1	20732082	A	G	1.04 [1.02-1.07]	0.0014
rs3795509	1	20881309	A	T	2.08 [1.35-3.22]	0.00099
rs10902716	1	26311408	C	T	1.04 [1.02-1.07]	0.001
rs12408803	1	26319835	A	G	1.04 [1.02-1.07]	0.0012
rs11247841	1	26324520	C	T	1.05 [1.02-1.07]	0.001
rs11247842	1	26327671	A	C	1.04 [1.02-1.07]	0.00075
rs4659401	1	26327825	C	T	1.04 [1.02-1.07]	0.00071
rs2997457	1	26343112	C	T	1.06 [1.03-1.1]	0.00081
rs6598939	1	26346284	C	T	1.05 [1.02-1.08]	0.00064
rs1938405	1	26349967	T	C	1.05 [1.02-1.08]	0.0013
rs11247932	1	26689659	A	G	1.05 [1.02-1.07]	0.001
rs454595	1	30521812	C	T	1.06 [1.02-1.1]	0.00073
rs375610	1	30522126	T	A	1.06 [1.03-1.1]	0.00026
rs424947	1	30522232	A	G	1.06 [1.03-1.1]	0.00032
rs12094129	1	30522288	G	T	1.06 [1.03-1.1]	0.00034
rs1391489	1	30522300	C	T	1.06 [1.03-1.1]	0.00012
rs1149028	1	31177455	G	C	1.05 [1.02-1.08]	0.0014
rs1473	1	31412919	A	G	1.07 [1.03-1.11]	0.00092
rs4653013	1	34754967	G	A	1.05 [1.02-1.08]	0.00095
rs12116935	1	36789546	G	A	1.06 [1.03-1.1]	0.00019
rs640218	1	38222121	G	A	1.25 [1.1-1.42]	0.00082
rs10888683	1	39623669	A	T	1.04 [1.02-1.07]	0.0013
rs1537817	1	39639653	T	C	1.06 [1.02-1.09]	0.0012
rs4660543	1	39678990	G	A	1.06 [1.02-1.09]	0.00061
rs4660550	1	39688459	T	A	1.05 [1.02-1.08]	0.00068
rs4660603	1	39736334	G	C	1.06 [1.03-1.09]	0.00046
rs2275187	1	39763242	G	A	1.05 [1.02-1.07]	0.00064
rs636083	1	39821681	C	T	1.05 [1.03-1.08]	9.6e-05
rs1180383	1	39846267	A	G	1.05 [1.03-1.08]	0.00013
rs7554206	1	39929240	T	C	1.05 [1.02-1.08]	0.00084
rs4617393	1	39940223	C	T	1.05 [1.02-1.08]	0.00046
rs4660293	1	40028180	G	A	1.06 [1.02-1.09]	0.00068
rs7534059	1	41480895	G	T	1.07 [1.03-1.12]	0.0011
rs213751	1	41609886	G	T	1.05 [1.02-1.08]	0.0012
rs6672914	1	41666929	C	T	1.05 [1.02-1.08]	0.0013
rs12121121	1	41684456	G	A	1.05 [1.02-1.08]	0.0014
rs2275931	1	41730151	G	T	1.05 [1.02-1.08]	0.00093
rs2154319	1	41745770	T	C	1.08 [1.04-1.12]	0.00019
rs11211529	1	47855589	A	G	1.24 [1.09-1.41]	0.0011
rs12021515	1	47873083	A	C	1.17 [1.08-1.27]	0.00023
rs3001644	1	50722989	G	A	1.06 [1.02-1.1]	0.0014
rs1278523	1	50894498	T	G	1.08 [1.04-1.13]	0.00038
rs1278522	1	50895031	T	C	1.09 [1.04-1.14]	0.00026
rs1278518	1	50897841	T	C	1.11 [1.06-1.16]	2.2e-05
rs1278516	1	50900021	G	A	1.1 [1.05-1.15]	4.8e-05
rs17106175	1	50904241	G	A	1.1 [1.05-1.15]	7e-05
rs12076604	1	50906366	T	C	1.1 [1.05-1.15]	2.7e-05
rs12072155	1	50908741	T	A	1.1 [1.05-1.15]	9.4e-05
rs12096508	1	50920161	C	A	1.1 [1.06-1.16]	1.9e-05
rs17106219	1	50935031	C	T	1.1 [1.05-1.15]	0.00011
rs12065210	1	50942784	C	T	1.1 [1.06-1.15]	1.7e-05
rs17106235	1	50943370	C	G	1.11 [1.06-1.15]	6.8e-06
rs1474784	1	50944634	C	G	1.1 [1.05-1.15]	5.1e-05
rs3789576	1	50945526	G	T	1.1 [1.05-1.15]	2.4e-05
rs3789577	1	50954128	G	A	1.1 [1.05-1.15]	2.6e-05
rs1846522	1	50981205	G	A	1.1 [1.05-1.16]	2.6e-05
rs3827731	1	50987827	A	G	1.1 [1.05-1.16]	4.5e-05
rs12063007	1	51166302	G	T	1.11 [1.06-1.16]	1.2e-05
rs12086130	1	51173603	C	T	1.11 [1.06-1.16]	1.1e-05
rs12090545	1	51193984	A	G	1.11 [1.06-1.16]	1.6e-05
rs12084054	1	51242141	C	T	1.11 [1.06-1.16]	6.4e-06
rs12089747	1	51246155	C	T	1.1 [1.05-1.15]	3.1e-05
rs12075991	1	51252618	T	C	1.1 [1.05-1.15]	2.5e-05
rs1015085	1	51260668	C	A	1.12 [1.06-1.17]	6.6e-06
rs3789587	1	51266474	C	T	1.11 [1.06-1.16]	5.8e-06
rs3789588	1	51266523	G	A	1.11 [1.06-1.16]	1.2e-05
rs12085022	1	51269018	T	C	1.11 [1.06-1.16]	1e-05
rs12058197	1	51284557	T	C	1.11 [1.06-1.16]	1.1e-05
rs11205773	1	51284905	T	C	1.11 [1.07-1.17]	1.9e-06
rs11205777	1	51286954	T	A	1.11 [1.06-1.16]	1.4e-05
rs2095864	1	51299597	C	T	1.1 [1.04-1.15]	0.00015
rs2105211	1	51299810	G	C	1.11 [1.06-1.16]	1.4e-05
rs12089749	1	51306329	C	A	1.11 [1.06-1.16]	9.7e-06
rs12067513	1	51310062	G	A	1.11 [1.06-1.16]	8.1e-06
rs12076849	1	51362441	C	T	1.11 [1.06-1.16]	1.7e-05
rs12089041	1	51381594	C	T	1.11 [1.06-1.16]	9.2e-06
rs12078434	1	51393645	G	C	1.1 [1.05-1.15]	5.1e-05
rs3176466	1	51438365	C	T	1.1 [1.05-1.15]	2.2e-05
rs12088739	1	51506886	A	G	1.1 [1.05-1.15]	0.0001
rs11205807	1	51535380	C	T	1.1 [1.04-1.16]	0.0014
rs11205821	1	51631884	C	T	1.09 [1.03-1.14]	0.00097
rs11206274	1	54494702	G	T	1.19 [1.08-1.31]	0.00041
rs2407515	1	59936406	T	G	1.12 [1.05-1.2]	0.0012
rs999268	1	59936423	A	G	1.12 [1.04-1.2]	0.0013
rs7519085	1	62069083	T	C	1.05 [1.02-1.08]	0.0014
rs11207789	1	62080405	G	A	1.05 [1.02-1.08]	0.00086
rs10889241	1	62080709	A	T	1.05 [1.02-1.08]	0.00037
rs10889243	1	62081148	A	G	1.05 [1.02-1.08]	0.00034
rs7529815	1	62082629	G	A	1.05 [1.02-1.08]	0.00054
rs7530003	1	62082800	G	A	1.05 [1.02-1.08]	0.00043
rs12077210	1	65894160	T	C	1.12 [1.05-1.19]	0.00046
rs12065099	1	65896308	C	T	1.11 [1.05-1.18]	0.00031
rs17097182	1	65903445	T	A	1.11 [1.05-1.18]	0.00032
rs6669785	1	65904644	T	G	1.12 [1.05-1.19]	0.00021
rs10889550	1	65906067	G	A	1.12 [1.05-1.18]	0.00018
rs10889552	1	65906173	T	C	1.12 [1.06-1.19]	0.00013
rs10889553	1	65906265	A	G	1.11 [1.05-1.18]	0.00026
rs12406550	1	66573383	G	A	1.12 [1.05-1.18]	0.00031
rs17421629	1	66573600	G	A	1.11 [1.05-1.18]	0.00033
rs17455672	1	66585882	T	A	1.12 [1.05-1.19]	0.00026
rs11584681	1	66586653	C	G	1.12 [1.05-1.19]	0.00028
rs11576970	1	66586812	T	C	1.12 [1.05-1.19]	0.00025
rs17421977	1	66589631	A	G	1.12 [1.05-1.19]	0.00028
rs9651195	1	66956685	G	A	1.05 [1.02-1.08]	0.00037
rs1415979	1	66957311	T	G	1.05 [1.02-1.08]	0.0011
rs6588201	1	66963631	G	T	1.05 [1.02-1.08]	0.00075
rs17432225	1	66974214	G	A	1.05 [1.02-1.08]	0.00092
rs1338198	1	66991560	A	T	1.05 [1.02-1.08]	0.00028
rs10493407	1	66991699	G	T	1.05 [1.02-1.08]	0.00034
rs10493411	1	67027124	G	C	1.08 [1.04-1.12]	0.00013
rs11208910	1	67038874	T	C	1.07 [1.03-1.1]	0.00014
rs12039282	1	67058323	T	A	1.05 [1.02-1.09]	0.0014
rs11208916	1	67059646	A	G	1.06 [1.03-1.1]	0.00019
rs7535076	1	67062592	G	A	1.06 [1.03-1.1]	0.00024
rs12023176	1	67063531	T	C	1.08 [1.04-1.13]	0.00028
rs12041930	1	67073413	C	G	1.06 [1.03-1.09]	0.00028
rs12046520	1	67073974	C	T	1.07 [1.04-1.11]	0.00011
rs7551301	1	67081798	C	T	1.07 [1.03-1.1]	9.2e-05
rs10789211	1	67088603	C	T	1.06 [1.03-1.09]	0.00024
rs11208930	1	67090034	A	G	1.06 [1.03-1.1]	0.0002
rs6701907	1	67098974	G	A	1.06 [1.02-1.09]	0.0004
rs7526812	1	67109335	G	A	1.06 [1.03-1.09]	0.00015
rs6588214	1	67114286	A	G	1.06 [1.03-1.09]	0.00034
rs1925342	1	67115230	A	C	1.05 [1.02-1.09]	0.00066
rs6686606	1	67136537	T	C	1.07 [1.03-1.1]	0.00013
rs609707	1	67176983	C	T	1.05 [1.02-1.09]	0.0012
rs678499	1	67190199	G	A	1.06 [1.02-1.09]	0.001
rs12119487	1	70341859	A	T	1.23 [1.08-1.39]	0.0013
rs1327882	1	70456187	G	A	1.22 [1.09-1.38]	0.001
rs1327875	1	70464705	G	C	1.22 [1.09-1.38]	0.001
rs12144415	1	70626592	C	A	1.19 [1.07-1.31]	0.00085
rs646511	1	71447445	T	G	1.04 [1.02-1.07]	0.0012
rs646621	1	71447519	A	T	1.05 [1.02-1.08]	9.2e-05
rs647921	1	71447793	G	C	1.06 [1.02-1.1]	0.00086
rs6424414	1	71455470	T	C	1.04 [1.02-1.07]	0.0013
rs1983588	1	71468493	A	C	1.04 [1.02-1.07]	0.00067
rs11209733	1	71471750	C	G	1.04 [1.02-1.07]	0.0011
rs2268062	1	71485299	T	C	1.04 [1.02-1.07]	0.00071
rs2796186	1	71692659	A	G	1.04 [1.02-1.07]	0.0014
rs2796187	1	71693853	A	G	1.04 [1.02-1.07]	0.0013
rs2694955	1	71705104	A	T	1.04 [1.02-1.07]	0.00044
rs12025304	1	84025460	A	G	1.04 [1.02-1.07]	0.0014
rs2223780	1	84241333	A	T	1.32 [1.13-1.54]	0.00053
rs10489507	1	84279930	A	G	1.05 [1.02-1.09]	0.0012
rs11163849	1	84281197	G	A	1.04 [1.02-1.07]	0.0014
rs12129768	1	84628655	C	T	1.08 [1.03-1.14]	0.0014
rs17111415	1	94790054	C	A	1.44 [1.15-1.8]	0.0013
rs841675	1	95050728	T	C	1.05 [1.03-1.08]	0.0001
rs550927	1	96452343	C	T	1.05 [1.02-1.09]	0.0011
rs557081	1	96452985	A	T	1.06 [1.02-1.09]	0.00072
rs321273	1	96454633	C	T	1.05 [1.02-1.09]	0.0009
rs321272	1	96454683	T	A	1.05 [1.02-1.08]	0.0012
rs321268	1	96457579	T	C	1.06 [1.02-1.09]	0.00066
rs321267	1	96458875	A	C	1.06 [1.02-1.09]	0.00057
rs321266	1	96459411	T	C	1.06 [1.02-1.09]	0.00063
rs321264	1	96461394	T	C	1.06 [1.02-1.09]	0.0006
rs188882	1	96462069	C	T	1.06 [1.02-1.09]	0.00057
rs321257	1	96466010	C	T	1.06 [1.02-1.09]	0.00077
rs615413	1	96467524	G	T	1.06 [1.02-1.09]	0.00071
rs321251	1	96470231	T	C	1.06 [1.02-1.09]	0.00083
rs17422841	1	96627332	A	C	1.1 [1.04-1.17]	0.0014
rs17374635	1	96685378	C	T	1.16 [1.06-1.26]	0.00095
rs17531774	1	107987328	T	C	1.05 [1.02-1.08]	0.0013
rs4970833	1	109804646	G	A	1.05 [1.02-1.08]	0.00075
rs6689614	1	109807099	G	A	1.05 [1.02-1.07]	0.0013
rs12740374	1	109817590	T	G	1.06 [1.02-1.09]	0.00068
rs660240	1	109817838	T	C	1.06 [1.02-1.09]	0.0007
rs646776	1	109818530	C	T	1.06 [1.02-1.09]	0.00061
rs602633	1	109821511	T	G	1.06 [1.03-1.1]	0.00063
rs17645031	1	109834938	T	C	1.09 [1.03-1.15]	0.0013
rs10489472	1	112277917	T	C	1.1 [1.04-1.16]	0.0012
rs609801	1	112325513	C	A	1.11 [1.04-1.18]	0.001
rs12122980	1	113157181	T	C	1.05 [1.02-1.08]	0.00056
rs11102513	1	113160170	C	T	1.05 [1.02-1.08]	0.0011
rs11102514	1	113160419	C	T	1.06 [1.03-1.09]	0.00014
rs12130243	1	113169667	T	G	1.06 [1.03-1.09]	0.00013
rs17030613	1	113190807	A	C	1.06 [1.03-1.09]	4.9e-05
rs12756815	1	113207243	C	A	1.06 [1.03-1.09]	0.00011
rs2306940	1	113241052	T	C	1.08 [1.04-1.13]	0.00021
rs6679	1	113243048	C	T	1.09 [1.04-1.13]	0.00015
rs4659048	1	117528366	G	A	1.05 [1.02-1.09]	0.00052
rs3885	1	117530273	A	G	1.05 [1.02-1.08]	0.00014
rs1127655	1	117530507	C	T	1.05 [1.02-1.07]	0.00032
rs13951	1	117531620	G	A	1.07 [1.03-1.11]	7.6e-05
rs10801924	1	117537568	T	C	1.05 [1.02-1.08]	0.00022
rs10494192	1	117544702	T	C	1.05 [1.02-1.09]	0.00065
rs3767787	1	117560542	A	G	1.05 [1.02-1.07]	0.00096
rs3736908	1	117560818	A	G	1.05 [1.02-1.07]	0.00094
rs2806874	1	117561863	A	C	1.05 [1.02-1.08]	0.00012
rs755854	1	117563582	T	C	1.05 [1.02-1.07]	0.00072
rs10923824	1	119988512	G	A	1.05 [1.02-1.08]	0.0014
rs10910809	1	145395618	G	A	1.15 [1.06-1.25]	0.00081
rs6658763	1	146692373	T	C	1.07 [1.03-1.11]	0.00078
rs2354432	1	146693229	C	T	1.06 [1.02-1.09]	0.00094
rs7537483	1	146709877	G	C	1.07 [1.03-1.11]	0.00035
rs3820130	1	146724003	G	A	1.06 [1.02-1.1]	0.0012
rs3737845	1	146724408	A	G	1.07 [1.03-1.11]	0.00045
rs6593751	1	146726023	G	A	1.07 [1.03-1.11]	0.00046
rs3766524	1	146729093	G	A	1.07 [1.03-1.11]	0.00053
rs6683243	1	146733422	T	A	1.07 [1.03-1.11]	0.00052
rs11576360	1	146740576	G	A	1.06 [1.03-1.1]	0.00021
rs11579626	1	146741960	C	A	1.07 [1.03-1.11]	0.00063
rs6685775	1	146744294	G	A	1.07 [1.03-1.11]	0.00054
rs7545467	1	146746248	G	A	1.07 [1.03-1.11]	0.00069
rs6680778	1	146747153	T	C	1.06 [1.03-1.1]	0.0002
rs12404113	1	146750343	A	C	1.07 [1.03-1.11]	0.00073
rs6694347	1	146751140	C	T	1.07 [1.03-1.11]	0.00081
rs9661159	1	146757923	A	G	1.06 [1.03-1.1]	0.00091
rs2275249	1	146759320	G	C	1.07 [1.03-1.11]	0.00052
rs7516430	1	146767062	G	A	1.07 [1.04-1.11]	4e-05
rs4950398	1	146783569	A	G	1.12 [1.05-1.19]	0.00067
rs885305	1	146786080	A	G	1.07 [1.03-1.11]	0.00056
rs7520661	1	146793149	G	A	1.06 [1.03-1.11]	0.001
rs2353984	1	146813358	C	T	1.07 [1.03-1.11]	0.0012
rs4314933	1	146821386	T	C	1.06 [1.02-1.1]	0.0011
rs9782976	1	146825049	T	C	1.07 [1.03-1.1]	0.00011
rs2353999	1	146830686	C	T	1.06 [1.02-1.1]	0.0012
rs10751415	1	146830785	T	A	1.06 [1.02-1.1]	0.0013
rs12759145	1	146853886	T	C	1.04 [1.02-1.07]	0.00064
rs6684154	1	150981225	C	A	1.44 [1.16-1.78]	0.00082
rs11204853	1	151557131	T	C	1.08 [1.03-1.14]	0.00089
rs1308142	1	151671227	G	A	1.11 [1.05-1.17]	0.00027
rs11265364	1	160216969	C	T	1.05 [1.02-1.07]	0.00049
rs6670084	1	160217493	T	C	1.04 [1.02-1.07]	0.00082
rs4596880	1	160224700	A	T	1.04 [1.02-1.07]	0.00072
rs6690637	1	160230256	C	A	1.05 [1.03-1.08]	4.9e-05
rs947496	1	160232506	A	T	1.05 [1.03-1.08]	5.3e-05
rs947495	1	160232676	A	G	1.06 [1.03-1.08]	3.7e-05
rs6703880	1	160233720	C	A	1.05 [1.03-1.08]	5e-05
rs3898317	1	160234154	A	G	1.05 [1.03-1.08]	0.00013
rs6661197	1	160234691	G	T	1.05 [1.03-1.08]	9.1e-05
rs7552402	1	160238384	C	A	1.05 [1.03-1.08]	5.1e-05
rs4090047	1	160240725	G	A	1.05 [1.03-1.08]	0.00011
rs1557524	1	160246485	T	C	1.04 [1.02-1.07]	0.00056
rs10594	1	160247185	C	G	1.04 [1.02-1.07]	0.00062
rs2795067	1	160251792	G	A	1.05 [1.02-1.07]	0.00025
rs2820421	1	160256004	A	C	1.04 [1.02-1.07]	0.00061
rs7523769	1	160257980	A	T	1.05 [1.03-1.08]	4.4e-05
rs2369474	1	160262678	C	T	1.05 [1.03-1.08]	5.9e-05
rs1317944	1	160263124	T	C	1.05 [1.03-1.08]	5.5e-05
rs4634904	1	160285126	G	C	1.05 [1.03-1.08]	4.9e-05
rs6669995	1	160297924	T	C	1.05 [1.02-1.07]	0.00036
rs4656897	1	160302444	A	G	1.05 [1.03-1.08]	4.9e-05
rs1886419	1	160309664	G	T	1.05 [1.03-1.08]	5.1e-05
rs7512872	1	160310363	G	A	1.04 [1.02-1.07]	0.00043
rs10752637	1	160312265	G	T	1.05 [1.02-1.08]	0.00013
rs1886417	1	160313733	A	C	1.05 [1.02-1.07]	0.00053
rs6668576	1	160317021	T	C	1.04 [1.02-1.07]	0.00063
rs1105238	1	161681661	G	C	1.05 [1.02-1.08]	0.0013
rs12756470	1	161730198	C	G	1.1 [1.04-1.16]	0.00075
rs347274	1	162315981	A	T	1.31 [1.12-1.53]	0.00084
rs12021880	1	162920421	C	T	1.08 [1.03-1.12]	0.00071
rs2171682	1	164371632	C	G	1.07 [1.02-1.11]	0.0014
rs12030918	1	164392446	T	C	1.07 [1.03-1.12]	0.0012
rs11806933	1	164421385	A	G	1.07 [1.03-1.1]	0.00048
rs12049538	1	164422044	C	T	1.06 [1.03-1.1]	0.0007
rs12046734	1	164437174	G	A	1.09 [1.04-1.14]	8.8e-05
rs2272785	1	175161599	T	G	1.05 [1.02-1.08]	0.00059
rs12408994	1	175363585	T	A	1.69 [1.23-2.31]	0.0011
rs7542381	1	184635055	A	T	1.38 [1.19-1.61]	3.6e-05
rs33945715	1	192673525	T	C	2.68 [1.69-4.26]	2.9e-05
rs12726452	1	194001405	G	A	1.06 [1.03-1.1]	0.00063
rs6670107	1	194001984	A	G	1.06 [1.02-1.1]	0.00088
rs12731751	1	194011835	A	G	1.06 [1.03-1.1]	0.00052
rs958437	1	194013121	G	T	1.06 [1.02-1.09]	0.00075
rs2119856	1	194017664	A	C	1.06 [1.03-1.1]	0.00023
rs1888626	1	195048913	A	T	1.04 [1.02-1.07]	0.0014
rs16838525	1	195509949	C	T	1.06 [1.02-1.1]	0.00086
rs10921871	1	195544153	G	T	1.06 [1.02-1.09]	0.0013
rs7542212	1	197245860	G	A	1.05 [1.02-1.08]	0.00067
rs3790380	1	197246968	A	C	1.05 [1.02-1.08]	0.001
rs7551098	1	201177278	C	T	1.05 [1.02-1.08]	0.00057
rs7551538	1	201177538	G	T	1.04 [1.02-1.07]	0.0014
rs2282414	1	201183164	C	T	1.05 [1.02-1.08]	0.00041
rs2282415	1	201183363	C	T	1.05 [1.02-1.08]	0.00026
rs1568810	1	201183402	T	C	1.05 [1.02-1.07]	0.0012
rs2275673	1	201184275	C	T	1.05 [1.02-1.08]	0.00075
rs16848109	1	201195739	C	G	1.06 [1.02-1.1]	0.0011
rs12466	1	201197808	T	A	1.05 [1.02-1.08]	8.8e-05
rs7515270	1	201215814	G	A	1.06 [1.03-1.08]	1.4e-05
rs10920154	1	201216969	G	T	1.05 [1.02-1.07]	0.00077
rs6655968	1	201221802	A	G	1.06 [1.03-1.09]	2.6e-05
rs1997018	1	201236677	G	A	1.04 [1.02-1.07]	0.001
rs6427896	1	201237112	C	A	1.06 [1.03-1.09]	7e-06
rs1857489	1	201237807	G	A	1.05 [1.02-1.08]	0.00081
rs2298929	1	209822979	T	C	1.11 [1.05-1.16]	0.00012
rs2947411	2	614168	G	A	1.06 [1.02-1.09]	0.0011
rs7567570	2	615140	C	T	1.08 [1.04-1.11]	3.6e-05
rs939584	2	621558	T	C	1.07 [1.03-1.1]	0.0002
rs1320331	2	622161	C	G	1.08 [1.04-1.12]	2.2e-05
rs1320330	2	622225	G	T	1.08 [1.04-1.12]	2.7e-05
rs939583	2	622531	T	C	1.06 [1.02-1.09]	0.00077
rs939582	2	622723	G	A	1.08 [1.04-1.12]	3.3e-05
rs2867125	2	622827	C	T	1.07 [1.04-1.11]	5.5e-05
rs11127483	2	623691	A	G	1.08 [1.04-1.12]	2.5e-05
rs11127484	2	623798	C	T	1.08 [1.04-1.11]	5.6e-05
rs2867123	2	624524	C	G	1.06 [1.02-1.09]	0.00082
rs2867122	2	624581	C	A	1.06 [1.02-1.09]	0.00071
rs7576635	2	625057	T	C	1.08 [1.04-1.12]	1.9e-05
rs6744646	2	628504	G	A	1.08 [1.04-1.12]	2.9e-05
rs6744653	2	628524	G	A	1.08 [1.04-1.12]	3.7e-05
rs6752470	2	629694	A	T	1.08 [1.04-1.12]	3.8e-05
rs6732471	2	629914	A	G	1.08 [1.04-1.12]	3.4e-05
rs5017300	2	631099	G	C	1.08 [1.04-1.12]	2.5e-05
rs7585056	2	631528	G	A	1.08 [1.04-1.12]	3.2e-05
rs11127485	2	632028	T	C	1.06 [1.03-1.1]	0.0007
rs12623218	2	632146	A	T	1.07 [1.03-1.11]	0.00042
rs6548238	2	634905	C	T	1.09 [1.05-1.13]	9.8e-06
rs6755502	2	635721	C	T	1.06 [1.03-1.1]	0.00075
rs13393304	2	637830	G	A	1.07 [1.03-1.11]	0.0007
rs7601028	2	642499	G	C	1.14 [1.07-1.21]	2.8e-05
rs7604609	2	643303	G	C	1.06 [1.03-1.1]	0.00033
rs11127491	2	646145	C	T	1.09 [1.05-1.13]	8.9e-06
rs10190052	2	646674	C	T	1.09 [1.05-1.13]	7.5e-06
rs10173167	2	646767	A	G	1.09 [1.05-1.13]	8.5e-06
rs7571957	2	646803	C	T	1.09 [1.05-1.13]	8.8e-06
rs4854348	2	647760	G	A	1.08 [1.04-1.12]	1.5e-05
rs4854349	2	647861	C	T	1.08 [1.04-1.12]	1.5e-05
rs7570198	2	648198	T	C	1.08 [1.04-1.12]	1.5e-05
rs4423631	2	648758	C	T	1.09 [1.05-1.12]	9e-06
rs4452188	2	648810	A	G	1.09 [1.05-1.13]	8.9e-06
rs1320338	2	649347	T	G	1.08 [1.04-1.12]	1.4e-05
rs1320337	2	649867	A	T	1.08 [1.05-1.12]	1.2e-05
rs2867108	2	650143	T	C	1.09 [1.05-1.13]	9.3e-06
rs13386517	2	650479	G	C	1.09 [1.05-1.13]	9.7e-06
rs13401686	2	650519	A	G	1.08 [1.05-1.12]	1e-05
rs13386627	2	650560	G	C	1.08 [1.05-1.12]	1e-05
rs4613321	2	650647	A	G	1.06 [1.03-1.1]	0.00064
rs13386964	2	650828	G	A	1.06 [1.03-1.1]	0.00062
rs2867110	2	651105	G	C	1.06 [1.03-1.1]	0.00053
rs2867112	2	651349	T	G	1.09 [1.05-1.13]	9.9e-06
rs12714415	2	651430	T	C	1.08 [1.05-1.12]	1.2e-05
rs6719980	2	651507	T	C	1.08 [1.05-1.12]	1.2e-05
rs7608050	2	652247	G	A	1.08 [1.05-1.12]	1.2e-05
rs7574359	2	652542	T	C	1.08 [1.05-1.12]	1.1e-05
rs13415094	2	653093	T	C	1.08 [1.05-1.12]	1.2e-05
rs13396935	2	653195	G	A	1.08 [1.04-1.12]	2.1e-05
rs13397165	2	653354	G	A	1.08 [1.05-1.12]	1.4e-05
rs4340532	2	3924026	A	G	1.05 [1.02-1.09]	0.0012
rs12471984	2	4328889	A	G	1.06 [1.02-1.09]	0.00059
rs1446134	2	4822394	C	G	1.32 [1.14-1.54]	0.00033
rs17627382	2	7341809	T	C	1.07 [1.03-1.11]	0.00029
rs2056634	2	7383237	T	C	1.07 [1.03-1.1]	0.00067
rs7599240	2	7396510	G	A	1.07 [1.03-1.11]	0.00085
rs2059984	2	7397009	G	A	1.06 [1.03-1.1]	0.00049
rs10179409	2	11853755	G	A	1.06 [1.02-1.1]	0.001
rs13385255	2	14120389	T	C	1.06 [1.03-1.1]	0.00068
rs2176596	2	14130402	A	G	1.07 [1.03-1.11]	0.00086
rs2544532	2	15904993	G	A	1.05 [1.02-1.08]	0.00089
rs4668988	2	15929111	G	A	1.06 [1.02-1.1]	0.0012
rs3860055	2	17775828	A	G	1.1 [1.05-1.15]	0.00013
rs6756743	2	21301892	T	C	1.15 [1.06-1.24]	0.00041
rs1369703	2	25481898	T	C	1.11 [1.04-1.19]	0.0014
rs7586601	2	27584666	G	A	1.05 [1.02-1.08]	0.00024
rs1528533	2	27595756	C	G	1.05 [1.02-1.07]	0.0013
rs1647284	2	27608115	T	C	1.05 [1.02-1.07]	0.0011
rs7594812	2	27611469	G	A	1.04 [1.02-1.07]	0.0014
rs2911712	2	27626945	T	A	1.04 [1.02-1.07]	0.0014
rs4665976	2	27640325	G	A	1.04 [1.02-1.07]	0.0014
rs1728922	2	27644464	C	A	1.04 [1.02-1.07]	0.0014
rs6547626	2	27646770	T	C	1.04 [1.02-1.07]	0.0014
rs4665978	2	27648726	C	T	1.05 [1.02-1.08]	0.00025
rs780100	2	27652153	T	G	1.05 [1.02-1.07]	0.0013
rs704791	2	27657167	C	T	1.04 [1.02-1.07]	0.0014
rs780102	2	27659491	C	T	1.05 [1.02-1.08]	0.001
rs1260341	2	27663215	A	T	1.04 [1.02-1.07]	0.0013
rs4803	2	27667297	G	A	1.04 [1.02-1.07]	0.0012
rs780104	2	27677691	A	G	1.04 [1.02-1.07]	0.0014
rs780106	2	27681598	C	A	1.04 [1.02-1.07]	0.0013
rs780107	2	27684734	G	A	1.05 [1.02-1.07]	0.0012
rs780110	2	27685388	A	G	1.05 [1.03-1.08]	0.00016
rs1647276	2	27688601	T	C	1.04 [1.02-1.07]	0.0013
rs1647266	2	27693485	C	T	1.04 [1.02-1.07]	0.0013
rs780117	2	27698343	G	C	1.05 [1.02-1.07]	0.0012
rs704795	2	27716494	A	G	1.05 [1.02-1.07]	0.0012
rs813592	2	27721971	C	T	1.05 [1.02-1.08]	0.00077
rs1260320	2	27722416	A	G	1.05 [1.02-1.07]	0.0007
rs4425043	2	27733452	A	G	1.05 [1.02-1.08]	0.0007
rs780094	2	27741237	C	T	1.06 [1.03-1.09]	1e-05
rs780093	2	27742603	C	T	1.05 [1.02-1.08]	0.00014
rs11681351	2	27743423	A	G	1.05 [1.02-1.08]	0.00056
rs8179252	2	27746832	C	A	1.04 [1.02-1.07]	0.0014
rs7586315	2	28408698	C	T	1.11 [1.04-1.18]	0.0011
rs4666112	2	28850091	T	C	1.1 [1.04-1.16]	0.00057
rs17247889	2	34301669	C	T	1.09 [1.04-1.16]	0.0013
rs17339056	2	34304955	C	G	1.1 [1.04-1.16]	0.00069
rs17339077	2	34305524	G	T	1.1 [1.04-1.17]	0.0011
rs17247912	2	34305791	G	A	1.1 [1.04-1.17]	0.0012
rs1425021	2	34313003	A	G	1.11 [1.04-1.17]	0.00049
rs6758359	2	40288430	A	G	1.06 [1.02-1.09]	0.00088
rs392953	2	40455772	C	T	1.05 [1.02-1.08]	0.00097
rs390145	2	40457049	A	C	1.05 [1.02-1.08]	0.00039
rs392317	2	40473297	G	A	1.05 [1.02-1.08]	0.0005
rs380590	2	40473347	T	G	1.05 [1.02-1.08]	0.0012
rs369251	2	40476117	G	T	1.05 [1.02-1.08]	0.00068
rs12712864	2	43074392	A	T	1.06 [1.02-1.09]	0.0013
rs4952982	2	43428755	G	C	1.06 [1.03-1.09]	0.00014
rs1367173	2	43449385	C	T	1.11 [1.05-1.18]	0.00016
rs13399366	2	43461119	C	T	1.11 [1.05-1.17]	0.00017
rs13419550	2	43468636	T	C	1.1 [1.05-1.16]	0.00016
rs13430791	2	43481013	G	A	1.09 [1.03-1.14]	0.0011
rs6754453	2	43493049	C	T	1.11 [1.05-1.17]	0.00018
rs13388722	2	43493133	C	T	1.11 [1.05-1.17]	0.00013
rs7603255	2	43494177	T	C	1.1 [1.05-1.16]	9.6e-05
rs13424398	2	43494221	G	T	1.1 [1.05-1.16]	0.00015
rs13402198	2	43495108	A	T	1.11 [1.05-1.17]	0.00012
rs13399243	2	43501686	G	A	1.11 [1.05-1.17]	0.00015
rs6760167	2	43505058	C	T	1.11 [1.05-1.17]	0.00013
rs13397737	2	43506324	G	T	1.11 [1.05-1.17]	0.00014
rs13411327	2	43515483	G	C	1.12 [1.05-1.18]	0.00034
rs6728997	2	43523379	A	G	1.11 [1.05-1.17]	9.4e-05
rs6756560	2	43528478	C	T	1.12 [1.06-1.18]	6.8e-05
rs17334233	2	43546624	T	C	1.13 [1.07-1.19]	1.6e-05
rs17406126	2	43546632	A	T	1.12 [1.06-1.18]	6.2e-05
rs10167415	2	43552460	G	C	1.12 [1.06-1.18]	5.1e-05
rs17406174	2	43557484	C	G	1.13 [1.07-1.19]	2.2e-05
rs4372955	2	43566146	A	G	1.11 [1.05-1.16]	6.1e-05
rs13411629	2	43566990	T	C	1.12 [1.07-1.18]	7.1e-06
rs13414381	2	43567218	T	C	1.12 [1.07-1.18]	1e-05
rs13411485	2	43575984	C	G	1.13 [1.07-1.2]	9.4e-06
rs6743071	2	43586287	T	G	1.14 [1.07-1.21]	6.3e-05
rs13408002	2	43610027	C	T	1.1 [1.04-1.17]	0.00094
rs11899863	2	43618819	C	T	1.13 [1.06-1.2]	0.00012
rs7607777	2	43629931	G	T	1.13 [1.06-1.2]	0.00013
rs6714067	2	43632200	G	A	1.05 [1.02-1.08]	0.00043
rs6544653	2	43632950	C	T	1.05 [1.02-1.08]	0.0011
rs12465064	2	43646139	A	G	1.05 [1.02-1.08]	0.00098
rs12477432	2	43646168	T	A	1.05 [1.02-1.08]	0.00052
rs6747202	2	43647567	T	A	1.05 [1.02-1.08]	0.00059
rs6544658	2	43652117	T	C	1.05 [1.02-1.08]	0.00091
rs12989996	2	43652169	G	C	1.05 [1.02-1.08]	0.00084
rs4608575	2	43656924	T	C	1.05 [1.02-1.08]	0.0012
rs7575024	2	43666991	T	C	1.11 [1.05-1.17]	6.8e-05
rs7567685	2	43668169	G	C	1.1 [1.05-1.17]	0.00028
rs7567535	2	43668261	C	T	1.1 [1.05-1.17]	0.00031
rs7586101	2	43669851	T	C	1.11 [1.05-1.17]	6e-05
rs17030800	2	43671003	C	A	1.1 [1.05-1.17]	0.00032
rs7609256	2	43672499	A	C	1.1 [1.05-1.17]	0.00029
rs7556744	2	43672795	A	G	1.1 [1.05-1.16]	0.00012
rs7559842	2	43673442	A	G	1.1 [1.05-1.16]	0.00035
rs12105786	2	43676433	T	G	1.1 [1.05-1.17]	0.00031
rs12105399	2	43676939	C	G	1.1 [1.05-1.17]	0.00032
rs6746610	2	43677253	T	A	1.1 [1.05-1.17]	0.00032
rs6731998	2	43677273	G	C	1.1 [1.05-1.17]	0.00032
rs17406646	2	43678617	C	T	1.13 [1.06-1.21]	0.00013
rs12105626	2	43678759	C	G	1.1 [1.05-1.17]	0.0003
rs17030818	2	43680318	C	T	1.1 [1.05-1.17]	0.00032
rs6752448	2	43682596	G	C	1.1 [1.05-1.17]	0.00031
rs6728106	2	43683885	A	C	1.1 [1.04-1.16]	0.00041
rs7572923	2	43685109	C	A	1.11 [1.05-1.17]	0.00029
rs7599799	2	43685493	A	G	1.11 [1.05-1.17]	0.0003
rs7573500	2	43685625	C	T	1.11 [1.05-1.17]	0.0003
rs17030835	2	43686245	C	G	1.11 [1.06-1.17]	5.3e-05
rs6746058	2	43687542	T	C	1.11 [1.06-1.17]	4.1e-05
rs17030845	2	43687879	C	T	1.08 [1.03-1.13]	0.00064
rs7561287	2	43689071	A	G	1.1 [1.05-1.16]	0.00012
rs17030855	2	43689364	C	A	1.11 [1.05-1.17]	0.00025
rs17030859	2	43689904	G	A	1.11 [1.05-1.17]	0.00022
rs17039133	2	43694570	A	G	1.11 [1.05-1.17]	0.00019
rs11124937	2	43696215	T	C	1.05 [1.02-1.08]	0.0006
rs12712886	2	43699416	C	G	1.05 [1.02-1.08]	0.00077
rs13409687	2	43701151	T	C	1.11 [1.05-1.17]	0.00024
rs7561114	2	43701951	G	T	1.11 [1.05-1.17]	0.00023
rs7590220	2	43702151	A	G	1.11 [1.05-1.17]	0.00025
rs17030889	2	43702829	A	T	1.11 [1.05-1.17]	0.00024
rs6731980	2	43703183	T	G	1.11 [1.05-1.17]	0.00022
rs6717636	2	43703684	G	C	1.11 [1.05-1.17]	0.00021
rs17030890	2	43704092	A	G	1.11 [1.05-1.17]	0.0002
rs13416978	2	43705265	A	G	1.1 [1.05-1.16]	0.00016
rs13405158	2	43705286	T	C	1.11 [1.05-1.16]	7e-05
rs7609003	2	43705862	C	G	1.05 [1.02-1.08]	0.00025
rs7570242	2	43706002	T	C	1.11 [1.05-1.17]	0.00017
rs13408697	2	43706244	T	C	1.11 [1.05-1.17]	0.00023
rs13395290	2	43706319	C	T	1.11 [1.05-1.17]	0.00021
rs13395302	2	43706350	C	G	1.11 [1.05-1.17]	0.00021
rs17334919	2	43707385	C	T	1.14 [1.07-1.21]	1.8e-05
rs7600657	2	43710444	A	G	1.11 [1.05-1.17]	0.00022
rs7601093	2	43710807	A	G	1.11 [1.05-1.17]	0.00022
rs998768	2	43711523	G	T	1.1 [1.05-1.17]	0.00023
rs6746632	2	43712163	T	G	1.11 [1.05-1.17]	0.00019
rs6747229	2	43712610	T	A	1.11 [1.05-1.17]	0.00019
rs6732766	2	43712785	G	T	1.11 [1.05-1.17]	0.00017
rs13431070	2	43721954	G	A	1.1 [1.05-1.16]	0.00017
rs13422551	2	43724682	G	A	1.11 [1.05-1.17]	0.00017
rs6544665	2	43729212	G	A	1.14 [1.07-1.22]	3.9e-05
rs6544666	2	43732234	C	T	1.11 [1.05-1.17]	0.00018
rs6544668	2	43732488	T	C	1.11 [1.05-1.17]	0.00019
rs7564886	2	43733028	G	T	1.11 [1.05-1.17]	0.00019
rs17030946	2	43733509	G	T	1.1 [1.04-1.16]	0.00026
rs6757251	2	43734847	C	T	1.08 [1.03-1.13]	0.00086
rs13405076	2	43735353	T	C	1.11 [1.05-1.17]	0.00023
rs6761129	2	43735713	C	T	1.1 [1.04-1.16]	0.00041
rs6544669	2	43736171	T	C	1.11 [1.05-1.17]	0.00025
rs1388387	2	43736969	T	C	1.11 [1.05-1.17]	0.00026
rs10189235	2	43745520	C	G	1.11 [1.06-1.17]	3.8e-05
rs17030967	2	43748983	G	A	1.11 [1.05-1.17]	0.00026
rs17030980	2	43751480	T	C	1.1 [1.05-1.16]	0.00026
rs6751035	2	43752407	G	A	1.11 [1.05-1.17]	0.00019
rs6751161	2	43752548	G	A	1.11 [1.05-1.17]	0.00017
rs6726643	2	43753746	A	C	1.11 [1.05-1.17]	0.0002
rs6726917	2	43753913	A	C	1.12 [1.06-1.18]	1.9e-05
rs6752964	2	43754655	T	C	1.11 [1.05-1.17]	0.00021
rs7591387	2	43756032	C	T	1.11 [1.05-1.17]	0.00022
rs2172169	2	43757865	C	G	1.05 [1.02-1.08]	0.0011
rs17030998	2	43758199	A	G	1.11 [1.05-1.17]	0.0002
rs17031000	2	43758625	A	T	1.11 [1.05-1.17]	0.00026
rs17031005	2	43761299	A	G	1.11 [1.06-1.17]	2.7e-05
rs6717153	2	43763529	G	A	1.05 [1.02-1.08]	0.0013
rs17031088	2	43807090	T	C	1.08 [1.03-1.13]	0.0007
rs17031092	2	43809248	T	G	1.08 [1.04-1.13]	0.00061
rs12463527	2	43815945	A	G	1.08 [1.03-1.12]	0.0012
rs17031095	2	43819139	A	G	1.08 [1.03-1.12]	0.0012
rs17031106	2	43829056	A	G	1.08 [1.03-1.13]	0.00087
rs12467420	2	43831150	G	A	1.08 [1.03-1.13]	0.00072
rs7559723	2	43832049	C	T	1.08 [1.03-1.13]	0.0008
rs17031116	2	43833013	A	G	1.08 [1.03-1.12]	0.0012
rs12469695	2	43833258	C	T	1.08 [1.04-1.13]	0.00034
rs6712944	2	43834118	T	C	1.08 [1.03-1.12]	0.0011
rs6726404	2	43834163	A	G	1.08 [1.04-1.13]	0.0003
rs4339008	2	43834352	T	C	1.08 [1.04-1.13]	0.00023
rs12474102	2	43835570	A	C	1.08 [1.03-1.12]	0.0011
rs10186307	2	43839896	G	A	1.09 [1.03-1.15]	0.001
rs10186441	2	43840048	G	A	1.09 [1.03-1.14]	0.0011
rs12471904	2	43840673	G	C	1.09 [1.03-1.14]	0.0012
rs7602701	2	43841119	A	G	1.09 [1.03-1.14]	0.0011
rs6731636	2	43843046	G	T	1.09 [1.03-1.14]	0.0012
rs17031133	2	43844833	G	A	1.09 [1.04-1.14]	0.00032
rs6749617	2	43845329	A	T	1.09 [1.04-1.14]	0.00055
rs7568888	2	50245829	C	T	1.07 [1.03-1.12]	0.0007
rs7571903	2	50246224	C	G	1.08 [1.04-1.13]	0.00042
rs11897683	2	50249031	C	T	1.08 [1.04-1.13]	0.00041
rs17494917	2	50250758	A	G	1.07 [1.03-1.12]	0.00079
rs6745029	2	50257635	G	C	1.08 [1.04-1.13]	0.00035
rs9989877	2	51816988	T	A	1.05 [1.02-1.09]	0.0013
rs12616608	2	51821908	A	G	1.05 [1.02-1.09]	0.0012
rs12615199	2	51825253	A	T	1.05 [1.02-1.09]	0.001
rs11125367	2	51833851	C	G	1.06 [1.02-1.09]	0.00044
rs10168197	2	51834839	G	C	1.05 [1.02-1.08]	0.0012
rs6708550	2	51837400	C	A	1.06 [1.02-1.09]	0.0012
rs17862725	2	51837979	A	C	1.06 [1.03-1.09]	0.00032
rs1119247	2	51841800	G	T	1.06 [1.03-1.09]	0.0002
rs2465526	2	51849371	A	G	1.05 [1.02-1.09]	0.00091
rs2953299	2	51852093	C	T	1.06 [1.02-1.09]	0.0006
rs2953300	2	51852373	C	T	1.06 [1.03-1.09]	0.00027
rs11562960	2	51856605	A	G	1.08 [1.03-1.13]	0.0011
rs11562967	2	51865472	C	A	1.05 [1.02-1.09]	0.00072
rs1159982	2	51867257	T	A	1.06 [1.02-1.09]	0.0004
rs4531963	2	51869541	A	T	1.05 [1.02-1.09]	0.00092
rs7571441	2	51870503	T	C	1.05 [1.02-1.09]	0.0013
rs1516174	2	51871341	G	A	1.05 [1.02-1.09]	0.00049
rs925801	2	51871521	G	A	1.06 [1.02-1.09]	0.00067
rs17864568	2	51871946	C	T	1.05 [1.02-1.09]	0.001
rs2090337	2	51874558	T	G	1.05 [1.02-1.09]	0.0011
rs10206043	2	51884529	T	A	1.06 [1.02-1.09]	0.00061
rs17864571	2	51888679	G	A	1.05 [1.02-1.08]	0.0012
rs1516198	2	51889019	G	A	1.06 [1.02-1.09]	0.00067
rs966734	2	51890442	G	T	1.06 [1.02-1.09]	0.00067
rs1516177	2	51894128	T	C	1.06 [1.03-1.1]	0.00033
rs1400101	2	51896988	T	A	1.06 [1.02-1.09]	0.00062
rs11563268	2	51897741	A	G	1.06 [1.02-1.09]	0.00072
rs1516182	2	51900765	G	C	1.05 [1.02-1.08]	0.00095
rs6758434	2	51900836	A	C	1.05 [1.02-1.08]	0.00086
rs1400104	2	51901085	A	G	1.05 [1.02-1.09]	0.0007
rs1913983	2	51902617	T	C	1.06 [1.02-1.09]	0.0011
rs9309216	2	51902883	C	A	1.06 [1.02-1.09]	0.00086
rs9309217	2	51903004	G	C	1.05 [1.02-1.08]	0.0012
rs1516183	2	51904189	G	A	1.06 [1.02-1.09]	0.0011
rs10166893	2	51904584	T	G	1.05 [1.02-1.08]	0.001
rs10190410	2	51904598	C	A	1.05 [1.02-1.08]	0.0013
rs2176220	2	51904737	G	T	1.05 [1.02-1.09]	0.0013
rs12713144	2	51904845	A	G	1.05 [1.02-1.08]	0.0013
rs4546040	2	51907652	A	G	1.06 [1.02-1.09]	0.00058
rs959661	2	51908399	C	T	1.05 [1.02-1.09]	0.00092
rs4146702	2	51909213	C	T	1.06 [1.02-1.09]	0.00052
rs6720129	2	51910682	T	C	1.05 [1.02-1.09]	0.00079
rs1400111	2	51911016	A	C	1.06 [1.02-1.09]	0.00048
rs1400112	2	51911211	A	C	1.06 [1.02-1.09]	0.00053
rs6714367	2	51914354	T	C	1.05 [1.02-1.09]	0.001
rs12474163	2	51918755	A	G	1.06 [1.02-1.09]	0.00095
rs6739137	2	51920657	A	G	1.06 [1.03-1.09]	0.00048
rs12691185	2	51920937	A	T	1.06 [1.03-1.09]	0.0002
rs4672096	2	56413345	G	T	1.07 [1.03-1.11]	0.00075
rs10210132	2	59471298	T	C	1.06 [1.02-1.09]	0.0011
rs1512228	2	60561931	T	C	1.04 [1.02-1.07]	0.001
rs9784100	2	60562714	G	C	1.04 [1.02-1.07]	0.00091
rs243089	2	60568691	C	T	1.05 [1.02-1.08]	0.00078
rs243088	2	60568745	T	A	1.06 [1.04-1.09]	3.2e-06
rs243087	2	60569348	G	A	1.04 [1.02-1.07]	0.0014
rs243085	2	60572671	T	C	1.06 [1.03-1.09]	8.8e-06
rs243084	2	60573424	G	A	1.05 [1.02-1.08]	0.00077
rs184838	2	60577289	T	G	1.06 [1.03-1.08]	4.8e-05
rs12999941	2	60579624	C	T	1.06 [1.03-1.08]	7.7e-06
rs968919	2	60579988	C	T	1.06 [1.03-1.09]	3.8e-06
rs9309325	2	60580831	A	G	1.06 [1.03-1.09]	4.1e-06
rs243025	2	60582051	T	C	1.05 [1.02-1.08]	0.00054
rs243021	2	60584819	A	G	1.07 [1.04-1.1]	1.4e-07
rs243019	2	60585806	C	T	1.07 [1.04-1.1]	9.5e-08
rs243052	2	60590257	G	A	1.06 [1.03-1.1]	0.00051
rs243050	2	60592027	G	A	1.06 [1.03-1.1]	0.00024
rs243037	2	60599100	C	G	1.05 [1.02-1.09]	0.0012
rs2556376	2	60760032	C	A	1.07 [1.03-1.1]	0.00075
rs2556377	2	60760637	G	A	1.06 [1.02-1.09]	0.001
rs2556378	2	60762502	T	G	1.06 [1.02-1.1]	0.00088
rs3771270	2	60769455	A	G	1.07 [1.03-1.11]	0.00014
rs6739994	2	60770454	C	T	1.07 [1.03-1.11]	0.00014
rs2723086	2	65297686	C	T	1.07 [1.03-1.12]	0.00058
rs7604944	2	65546422	C	T	1.07 [1.03-1.11]	0.0004
rs1866051	2	65602149	C	T	1.04 [1.02-1.07]	0.0012
rs174847	2	65605194	C	T	1.05 [1.02-1.07]	0.00069
rs11689314	2	65605408	G	T	1.05 [1.02-1.07]	0.00061
rs268139	2	65606991	A	C	1.05 [1.02-1.08]	0.00032
rs198478	2	65607011	A	G	1.05 [1.02-1.08]	0.00033
rs1876518	2	65608909	C	T	1.05 [1.02-1.08]	0.00032
rs268132	2	65609677	T	C	1.05 [1.02-1.08]	0.0003
rs268131	2	65610471	T	A	1.04 [1.02-1.07]	0.0011
rs702875	2	65614197	C	T	1.04 [1.02-1.07]	0.0014
rs1039764	2	65614613	T	C	1.05 [1.02-1.08]	0.0004
rs4303705	2	65619710	C	T	1.05 [1.02-1.07]	0.00084
rs2661796	2	65627406	T	C	1.05 [1.02-1.08]	0.0003
rs2661797	2	65633190	G	A	1.05 [1.02-1.08]	0.00045
rs2661798	2	65635688	A	T	1.04 [1.02-1.07]	0.00083
rs12470883	2	65651851	G	A	1.05 [1.02-1.08]	0.00066
rs7572922	2	65652156	C	T	1.05 [1.02-1.08]	0.00079
rs2028150	2	65655012	C	G	1.05 [1.02-1.08]	0.00037
rs2028151	2	65655613	A	T	1.05 [1.02-1.08]	0.00034
rs1437466	2	65664350	C	T	1.05 [1.02-1.08]	0.00017
rs2860773	2	65665641	G	T	1.05 [1.02-1.08]	0.00024
rs6546151	2	65676583	G	A	1.05 [1.03-1.08]	0.0002
rs7575614	2	65689800	C	T	1.05 [1.02-1.08]	0.00054
rs702876	2	65701634	C	T	1.05 [1.02-1.08]	0.00069
rs702878	2	65702609	A	G	1.05 [1.02-1.08]	0.00078
rs840970	2	65703249	A	T	1.05 [1.02-1.08]	0.00083
rs13420432	2	67086639	A	G	1.04 [1.02-1.07]	0.00072
rs2194662	2	67087305	A	C	1.04 [1.02-1.07]	0.0012
rs13018976	2	67087873	A	G	1.04 [1.02-1.07]	0.0012
rs10196555	2	67092494	G	T	1.05 [1.02-1.08]	0.0009
rs1073280	2	67092727	T	C	1.05 [1.02-1.07]	0.00095
rs7599395	2	67093779	T	C	1.05 [1.02-1.09]	0.0014
rs1111235	2	67096453	A	T	1.04 [1.02-1.07]	0.001
rs12713581	2	67097129	A	C	1.05 [1.02-1.07]	0.00068
rs6714614	2	67449899	A	C	1.06 [1.03-1.09]	5.3e-05
rs875037	2	67456700	T	C	1.06 [1.03-1.09]	1.3e-05
rs1351723	2	67459307	C	G	1.06 [1.03-1.09]	0.00028
rs1483337	2	67461649	C	G	1.06 [1.03-1.09]	5.2e-05
rs1483339	2	67462727	T	C	1.06 [1.03-1.09]	5.4e-05
rs1483350	2	67519903	C	G	1.04 [1.02-1.07]	0.0013
rs7568231	2	67520850	A	G	1.04 [1.02-1.07]	0.0013
rs11695960	2	67521367	G	T	1.04 [1.02-1.07]	0.0014
rs11696003	2	67521392	G	C	1.04 [1.02-1.07]	0.0014
rs12991257	2	67527590	G	A	1.05 [1.02-1.08]	0.00085
rs979043	2	67566281	T	C	1.04 [1.02-1.07]	0.0008
rs6725762	2	67566805	C	T	1.11 [1.04-1.18]	0.00084
rs17603914	2	67570448	G	A	1.1 [1.04-1.16]	0.00097
rs13014438	2	67578409	A	G	1.1 [1.04-1.16]	0.00085
rs1601531	2	67598104	T	C	1.04 [1.02-1.07]	0.00091
rs6739392	2	67601971	A	T	1.07 [1.03-1.11]	0.00036
rs11888062	2	67605358	C	A	1.05 [1.02-1.07]	0.00069
rs13026513	2	67611527	C	T	1.1 [1.04-1.16]	0.0012
rs6546303	2	67613118	G	A	1.04 [1.02-1.07]	0.0012
rs5022017	2	67619177	G	A	1.04 [1.02-1.07]	0.001
rs1063571	2	67632214	T	C	1.1 [1.04-1.16]	0.001
rs13030211	2	67633315	A	C	1.1 [1.04-1.16]	0.001
rs13030037	2	67633342	G	A	1.1 [1.04-1.16]	0.001
rs17545245	2	67636837	G	A	1.1 [1.04-1.16]	0.001
rs17545301	2	67638349	A	G	1.1 [1.04-1.16]	0.001
rs17545329	2	67639135	G	T	1.1 [1.04-1.16]	0.001
rs12185591	2	67642898	G	A	1.1 [1.04-1.16]	0.0011
rs6546307	2	67644053	C	T	1.05 [1.02-1.07]	0.00062
rs1944911	2	67647161	C	G	1.05 [1.02-1.07]	0.00068
rs13017696	2	67654637	A	G	1.1 [1.04-1.16]	0.0013
rs13015349	2	67657745	C	T	1.1 [1.04-1.16]	0.0013
rs13035051	2	67660166	C	T	1.1 [1.04-1.16]	0.0014
rs13000557	2	67664719	G	A	1.1 [1.04-1.16]	0.0014
rs13035754	2	67669461	C	G	1.11 [1.04-1.17]	0.0012
rs12233208	2	67711856	T	C	1.05 [1.02-1.08]	0.00014
rs13018194	2	70025988	A	G	1.05 [1.02-1.08]	0.0012
rs12995760	2	70029812	T	C	1.05 [1.02-1.08]	0.0012
rs6546549	2	70030469	G	C	1.05 [1.02-1.08]	0.0012
rs3771475	2	70769328	C	T	1.06 [1.02-1.09]	0.0012
rs6725892	2	71516191	C	T	1.05 [1.02-1.08]	0.0012
rs3755335	2	71594219	G	A	1.05 [1.02-1.08]	0.0014
rs2013708	2	71600354	A	G	1.05 [1.02-1.08]	0.00068
rs6760748	2	71600924	C	T	1.05 [1.02-1.08]	0.0014
rs10183619	2	77219467	T	C	1.24 [1.09-1.41]	0.0011
rs10186912	2	77220195	A	G	1.24 [1.09-1.41]	0.0011
rs1529785	2	80791676	C	T	1.23 [1.1-1.37]	0.00025
rs3768992	2	101599864	G	A	1.04 [1.02-1.07]	0.0013
rs3768993	2	101599945	T	C	1.05 [1.02-1.07]	0.001
rs6726870	2	101606511	G	A	1.05 [1.02-1.08]	0.00027
rs1867861	2	101608041	G	C	1.05 [1.02-1.08]	0.00058
rs1374324	2	101614322	G	A	1.04 [1.02-1.07]	0.00066
rs746924	2	101624471	C	T	1.04 [1.02-1.07]	0.001
rs4850956	2	101628324	A	G	1.04 [1.02-1.07]	0.00073
rs7570839	2	101636892	A	G	1.05 [1.02-1.07]	0.00061
rs11886914	2	101637515	G	T	1.05 [1.02-1.07]	0.00057
rs3739014	2	101638888	G	A	1.04 [1.02-1.07]	0.00085
rs7577290	2	101641666	G	A	1.05 [1.02-1.07]	0.00044
rs2310027	2	101651922	G	T	1.07 [1.03-1.12]	0.00084
rs6725064	2	101662694	T	G	1.05 [1.02-1.08]	0.0002
rs6725082	2	101662722	A	G	1.05 [1.02-1.08]	0.0003
rs6543008	2	101663708	A	G	1.05 [1.02-1.08]	0.00023
rs4851401	2	101700518	C	T	1.05 [1.02-1.08]	0.00087
rs2592392	2	101723343	G	A	1.05 [1.02-1.07]	0.00072
rs4851407	2	101759182	G	A	1.05 [1.02-1.07]	0.0011
rs1192779	2	101789124	T	C	1.05 [1.02-1.08]	0.00054
rs1620893	2	101796760	G	T	1.06 [1.03-1.09]	7.8e-05
rs11681579	2	107156542	A	G	1.15 [1.06-1.25]	0.0012
rs6746608	2	111892984	A	G	1.04 [1.02-1.07]	0.0014
rs17041869	2	111896243	A	G	1.06 [1.02-1.1]	0.0014
rs3898882	2	111947467	G	A	1.05 [1.02-1.08]	0.00011
rs2587686	2	120285695	T	G	1.05 [1.02-1.07]	0.00072
rs2579618	2	120288463	G	T	1.05 [1.02-1.07]	0.00037
rs2579621	2	120294700	C	A	1.05 [1.02-1.07]	0.00046
rs2587653	2	120298231	T	C	1.04 [1.02-1.07]	0.00063
rs2579623	2	120298350	T	A	1.05 [1.02-1.08]	0.00024
rs2587654	2	120299172	G	C	1.05 [1.02-1.08]	0.00017
rs2579624	2	120303820	T	A	1.05 [1.02-1.08]	0.00029
rs2587710	2	120311479	T	A	1.05 [1.02-1.07]	0.00044
rs2920695	2	120318903	C	T	1.05 [1.02-1.08]	0.00029
rs2587706	2	120323261	C	T	1.05 [1.02-1.08]	0.00024
rs12617662	2	121309778	C	T	1.07 [1.03-1.11]	0.0014
rs12617782	2	121310139	G	A	1.07 [1.03-1.11]	0.00051
rs7573109	2	123792279	T	A	1.05 [1.02-1.07]	0.0012
rs3893313	2	127988387	C	G	1.06 [1.03-1.09]	0.00033
rs4300780	2	127989971	A	G	1.05 [1.02-1.08]	0.00088
rs17261964	2	128363608	G	A	1.05 [1.02-1.08]	0.0011
rs10928774	2	128368050	G	A	1.05 [1.02-1.09]	0.00087
rs12053039	2	128369752	A	G	1.05 [1.02-1.09]	0.00095
rs12052654	2	128369917	C	T	1.05 [1.02-1.09]	0.00098
rs13006453	2	128370856	T	C	1.05 [1.02-1.09]	0.001
rs11675513	2	128373562	G	A	1.05 [1.02-1.09]	0.00091
rs10928775	2	128374180	T	A	1.05 [1.02-1.09]	0.00088
rs13004906	2	128375542	C	T	1.05 [1.02-1.09]	0.00086
rs13015157	2	128381594	C	T	1.05 [1.02-1.08]	0.00075
rs13025791	2	128388790	G	A	1.05 [1.02-1.09]	0.0012
rs13025959	2	128388862	G	C	1.06 [1.02-1.09]	0.0011
rs4850266	2	131651946	G	A	1.13 [1.05-1.22]	0.00097
rs6430623	2	137065310	C	T	1.08 [1.03-1.13]	0.0013
rs1448923	2	138376740	T	A	1.17 [1.07-1.28]	0.0004
rs16823566	2	144950248	T	G	1.08 [1.03-1.12]	0.00087
rs16823569	2	144951782	T	C	1.07 [1.03-1.12]	0.0011
rs13383062	2	144952961	C	G	1.08 [1.03-1.12]	0.001
rs6725333	2	144960330	C	G	1.08 [1.03-1.12]	0.001
rs10191725	2	144960783	T	C	1.08 [1.03-1.12]	0.00076
rs6715658	2	144963163	T	C	1.08 [1.03-1.12]	0.00073
rs6731750	2	144963843	C	T	1.08 [1.03-1.12]	0.00072
rs16823583	2	144969618	C	T	1.07 [1.03-1.12]	0.001
rs10496961	2	144970577	T	C	1.08 [1.03-1.12]	0.00076
rs13432930	2	144982289	T	C	1.08 [1.03-1.12]	0.00071
rs6758720	2	145042747	G	A	1.08 [1.03-1.13]	0.00058
rs1438896	2	145646072	T	C	1.06 [1.03-1.09]	0.00028
rs17479393	2	145653287	T	A	1.05 [1.02-1.08]	0.0012
rs10928235	2	145678114	T	A	1.06 [1.02-1.1]	0.00072
rs11684042	2	145684278	A	G	1.05 [1.02-1.09]	0.0014
rs9646682	2	145712376	G	C	1.06 [1.02-1.09]	0.00038
rs11674165	2	145725530	G	A	1.06 [1.03-1.09]	0.00029
rs1371048	2	145753166	T	G	1.05 [1.02-1.08]	0.00085
rs726857	2	145753424	A	T	1.05 [1.02-1.08]	0.00078
rs7567332	2	149392811	T	C	1.1 [1.05-1.15]	7.6e-05
rs4972288	2	149418972	C	A	1.17 [1.07-1.29]	0.0011
rs2028918	2	149512886	T	C	1.07 [1.03-1.11]	0.0012
rs12692722	2	151353052	A	T	1.04 [1.02-1.07]	0.0013
rs10177711	2	151374518	T	G	1.05 [1.02-1.09]	0.00042
rs12692748	2	151381624	A	C	1.05 [1.02-1.08]	0.0011
rs289862	2	152055452	G	A	1.04 [1.02-1.07]	0.0014
rs2444256	2	152280365	A	G	1.05 [1.02-1.07]	0.00025
rs6731486	2	152410732	G	A	1.05 [1.02-1.07]	0.0002
rs6724796	2	152412813	T	C	1.04 [1.02-1.07]	0.0012
rs13393021	2	152413258	C	A	1.05 [1.02-1.07]	0.00085
rs7602715	2	152421937	G	A	1.05 [1.02-1.07]	0.00027
rs4665122	2	160678186	C	T	1.06 [1.02-1.09]	0.0014
rs1344632	2	160685431	T	C	1.05 [1.02-1.07]	0.00038
rs2556094	2	160685529	A	G	1.06 [1.02-1.09]	0.0011
rs2556096	2	160686816	C	T	1.05 [1.02-1.08]	0.0003
rs2556097	2	160687061	C	T	1.05 [1.02-1.07]	0.00045
rs6755783	2	160688351	C	T	1.05 [1.02-1.07]	0.00055
rs6735923	2	160769588	T	C	1.04 [1.02-1.07]	0.001
rs16844706	2	160897655	T	C	1.07 [1.03-1.11]	0.00033
rs4426485	2	160898917	T	A	1.07 [1.03-1.11]	0.00028
rs3792195	2	160899995	A	G	1.06 [1.03-1.1]	0.00065
rs1355421	2	160913218	G	A	1.07 [1.03-1.11]	0.00011
rs1355420	2	160913271	C	T	1.06 [1.03-1.09]	0.00031
rs11902480	2	160914725	T	A	1.07 [1.03-1.11]	0.00011
rs12692587	2	161093259	T	A	1.08 [1.03-1.12]	0.00026
rs2925757	2	161101169	A	G	1.06 [1.03-1.1]	0.0005
rs4569429	2	161155479	T	G	1.07 [1.03-1.12]	0.00064
rs12692592	2	161163381	T	G	1.05 [1.02-1.08]	0.0013
rs4077463	2	161166234	G	A	1.06 [1.02-1.09]	0.00039
rs7593730	2	161171454	C	T	1.06 [1.02-1.09]	0.00047
rs4589705	2	161176136	A	T	1.05 [1.02-1.09]	0.00066
rs10201614	2	161177594	T	C	1.08 [1.03-1.14]	0.00096
rs10173594	2	161192293	G	A	1.07 [1.03-1.12]	0.00059
rs11694165	2	161195495	A	G	1.08 [1.04-1.12]	5.5e-05
rs12692593	2	161196868	A	C	1.08 [1.04-1.12]	9.7e-05
rs9287795	2	161209788	G	C	1.05 [1.02-1.09]	0.00068
rs6718526	2	161214175	C	T	1.06 [1.03-1.1]	0.00073
rs11693275	2	161220882	C	T	1.07 [1.03-1.12]	0.00089
rs12692594	2	161223688	A	T	1.07 [1.03-1.12]	0.00088
rs11693602	2	161224658	T	C	1.05 [1.02-1.08]	0.0012
rs10189764	2	161226834	G	A	1.07 [1.03-1.11]	0.0012
rs12997772	2	161228203	T	C	1.08 [1.04-1.13]	9.5e-05
rs12998352	2	161228333	A	G	1.07 [1.03-1.11]	0.0014
rs13431440	2	161286220	C	A	1.06 [1.02-1.1]	0.0011
rs13429951	2	161292387	T	C	1.06 [1.02-1.1]	0.00093
rs6742799	2	161317460	A	C	1.07 [1.04-1.11]	2.9e-05
rs6753933	2	161325475	A	T	1.06 [1.02-1.1]	0.0011
rs7423572	2	161344062	C	G	1.07 [1.04-1.11]	4.4e-05
rs7569522	2	161346447	A	G	1.05 [1.02-1.07]	0.00066
rs7557611	2	161440199	A	C	1.04 [1.02-1.07]	0.001
rs6752569	2	161473973	C	T	1.06 [1.03-1.08]	2.2e-05
rs4374386	2	161507237	T	C	1.05 [1.02-1.08]	0.00025
rs12473293	2	161529345	C	A	1.05 [1.02-1.08]	0.00024
rs1349556	2	161558467	G	C	1.1 [1.04-1.16]	0.0012
rs270933	2	161597652	T	G	1.05 [1.02-1.09]	0.0013
rs1371824	2	164399710	C	A	1.08 [1.03-1.13]	0.00075
rs3923113	2	165501849	A	C	1.08 [1.04-1.11]	1.5e-06
rs12692735	2	165504565	G	T	1.07 [1.04-1.11]	1.7e-06
rs10930133	2	165506724	T	A	1.08 [1.04-1.11]	1.3e-06
rs6754919	2	165507843	C	T	1.07 [1.04-1.11]	1.9e-06
rs6713419	2	165508300	T	C	1.06 [1.03-1.09]	2.1e-05
rs10184004	2	165508389	C	T	1.07 [1.04-1.11]	1.6e-06
rs7607886	2	165509579	G	A	1.07 [1.03-1.11]	0.00011
rs10195252	2	165513091	T	C	1.07 [1.04-1.1]	2.2e-06
rs13432797	2	165526587	G	C	1.07 [1.04-1.1]	3.3e-06
rs13389219	2	165528876	C	T	1.08 [1.05-1.11]	7.9e-07
rs6738627	2	165544450	G	A	1.09 [1.04-1.15]	0.0011
rs7607980	2	165551201	T	C	1.08 [1.04-1.13]	0.00038
rs6752978	2	165552942	G	T	1.07 [1.03-1.1]	4.6e-05
rs7609045	2	165555207	G	A	1.06 [1.03-1.1]	5.9e-05
rs6705646	2	165567695	A	G	1.05 [1.02-1.07]	0.00043
rs3769876	2	165569373	T	C	1.05 [1.02-1.08]	0.00029
rs10167778	2	165579065	T	G	1.12 [1.05-1.2]	0.00066
rs6432802	2	165579159	G	C	1.05 [1.02-1.07]	0.00063
rs12692741	2	165580714	A	C	1.12 [1.05-1.2]	0.0005
rs12692745	2	165597501	A	G	1.05 [1.02-1.08]	0.00026
rs3769891	2	165602181	A	G	1.06 [1.03-1.09]	0.00027
rs355896	2	165635908	G	A	1.04 [1.02-1.07]	0.0014
rs355900	2	165638070	T	C	1.05 [1.02-1.08]	0.00075
rs355908	2	165644043	T	C	1.05 [1.02-1.08]	0.00097
rs13006510	2	179682878	C	G	1.05 [1.02-1.08]	0.0014
rs12471428	2	179687519	C	T	1.05 [1.02-1.08]	0.0014
rs10190741	2	179687872	C	T	1.05 [1.02-1.07]	0.00086
rs12693257	2	181664063	T	C	1.15 [1.06-1.25]	0.001
rs1480481	2	185547462	C	T	1.05 [1.02-1.08]	0.0004
rs1837410	2	188871519	C	T	1.37 [1.14-1.64]	0.00071
rs6434254	2	188885663	C	T	1.13 [1.06-1.21]	0.00036
rs998173	2	190991626	A	T	1.23 [1.11-1.37]	0.00015
rs751219	2	191002047	G	C	1.21 [1.09-1.35]	0.00047
rs964100	2	194907930	T	C	1.37 [1.15-1.62]	0.00029
rs2712895	2	198051205	C	T	1.63 [1.26-2.09]	0.00017
rs6755925	2	198989378	T	C	2.29 [1.51-3.49]	0.00011
rs1878666	2	199581372	C	T	1.06 [1.03-1.1]	0.0006
rs1878667	2	199581496	C	T	1.06 [1.03-1.1]	0.00061
rs7600810	2	199590484	A	G	1.05 [1.02-1.08]	0.0014
rs4675220	2	199851159	A	G	1.25 [1.1-1.43]	0.00086
rs12053525	2	200064606	C	G	1.05 [1.02-1.08]	0.00041
rs3731700	2	203155936	C	A	1.06 [1.03-1.11]	0.0012
rs10176600	2	204402793	A	G	1.07 [1.03-1.11]	0.0008
rs10174652	2	204427340	A	G	1.06 [1.02-1.1]	0.0013
rs929944	2	205150223	A	T	1.07 [1.03-1.11]	0.00084
rs16841113	2	205153827	A	C	1.1 [1.05-1.15]	8.9e-05
rs16841133	2	205165441	A	C	1.08 [1.03-1.13]	0.0009
rs2353850	2	205180041	T	C	1.08 [1.03-1.14]	0.0013
rs16841178	2	205186475	T	C	1.1 [1.05-1.15]	8.5e-05
rs9288354	2	205378570	A	G	1.11 [1.05-1.18]	0.00057
rs7608764	2	205385547	A	G	1.15 [1.07-1.24]	0.0003
rs17042381	3	1711607	C	G	1.19 [1.08-1.32]	0.00049
rs17043101	3	1768266	G	A	1.17 [1.08-1.27]	0.00012
rs17043108	3	1768860	T	G	1.14 [1.06-1.22]	0.00047
rs9865768	3	1775845	G	T	1.16 [1.08-1.26]	0.00011
rs9848738	3	1775892	A	T	1.17 [1.09-1.26]	3.4e-05
rs7652609	3	1812610	C	A	1.15 [1.06-1.25]	0.0013
rs1553980	3	6183946	T	C	1.08 [1.03-1.13]	0.00057
rs7651296	3	6187051	G	A	1.07 [1.03-1.12]	0.001
rs9820630	3	6187451	T	C	1.06 [1.02-1.1]	0.0014
rs9860865	3	6205835	T	C	2.81 [1.5-5.26]	0.0013
rs9840868	3	7344099	G	A	1.31 [1.11-1.53]	0.00098
rs17692178	3	7963810	C	G	1.09 [1.03-1.14]	0.0012
rs10510377	3	7965922	G	C	1.09 [1.03-1.14]	0.0012
rs741495	3	10417929	T	C	1.06 [1.03-1.08]	1.6e-05
rs13071035	3	10418330	A	G	1.06 [1.03-1.08]	6.3e-06
rs2470453	3	10418526	C	T	1.06 [1.03-1.09]	1.1e-05
rs3774166	3	10418845	C	A	1.06 [1.03-1.08]	1.8e-05
rs751122	3	10420087	T	C	1.06 [1.03-1.08]	2.2e-05
rs997559	3	10422920	T	G	1.05 [1.02-1.08]	0.00037
rs1317122	3	10434941	C	T	1.06 [1.03-1.09]	1.5e-05
rs3774156	3	10436582	T	C	1.05 [1.02-1.08]	0.0009
rs1438168	3	10437280	T	C	1.05 [1.02-1.07]	0.00029
rs4684692	3	10472047	G	A	1.06 [1.03-1.1]	0.00075
rs4684045	3	10596349	A	G	1.06 [1.03-1.1]	0.00051
rs4572750	3	10605861	C	A	1.06 [1.03-1.1]	0.00023
rs7629483	3	10611507	A	G	1.06 [1.03-1.09]	0.0002
rs7632040	3	11427455	G	A	1.05 [1.02-1.07]	0.00073
rs3942925	3	11442921	C	T	1.05 [1.02-1.07]	0.00059
rs6784883	3	11444453	A	G	1.04 [1.02-1.07]	0.0013
rs4618208	3	11473679	A	G	1.1 [1.04-1.17]	0.00087
rs9816564	3	11475297	C	T	1.04 [1.02-1.07]	0.0013
rs9848170	3	11495983	C	G	1.04 [1.02-1.07]	0.0011
rs9823197	3	11503133	T	A	1.04 [1.02-1.07]	0.00095
rs4684072	3	11514860	G	A	1.05 [1.02-1.08]	0.0003
rs4684781	3	11516299	A	G	1.05 [1.02-1.07]	0.00067
rs6776159	3	11519324	G	A	1.05 [1.02-1.07]	0.00072
rs7615580	3	12027240	T	C	1.17 [1.1-1.24]	7.2e-08
rs2600268	3	12032812	A	G	1.07 [1.03-1.11]	0.0012
rs10510409	3	12083304	C	T	1.16 [1.1-1.23]	5.5e-07
rs11716141	3	12108754	T	C	1.1 [1.06-1.14]	1.4e-06
rs12233399	3	12125041	T	A	1.09 [1.05-1.13]	1.8e-05
rs2119812	3	12131687	C	T	1.17 [1.11-1.24]	3.9e-08
rs6442307	3	12143355	A	C	1.17 [1.1-1.24]	3.8e-07
rs11715886	3	12147236	C	G	1.17 [1.1-1.24]	2.8e-07
rs17035806	3	12148393	G	A	1.1 [1.06-1.14]	6.6e-07
rs13079332	3	12148848	G	A	1.18 [1.11-1.25]	1.6e-08
rs11720130	3	12156316	G	A	1.1 [1.06-1.14]	1.4e-06
rs4488811	3	12182028	C	T	1.17 [1.1-1.24]	8.6e-08
rs7621569	3	12184557	A	G	1.11 [1.07-1.16]	6.5e-08
rs11721223	3	12185160	A	G	1.18 [1.11-1.25]	1.4e-08
rs1867012	3	12188243	T	C	1.18 [1.11-1.25]	1.3e-08
rs11708978	3	12188495	A	G	1.18 [1.11-1.25]	1.3e-08
rs6768568	3	12189818	G	A	1.18 [1.11-1.25]	1.5e-08
rs6792867	3	12189900	A	C	1.18 [1.11-1.25]	1.5e-08
rs7629805	3	12192394	A	G	1.18 [1.12-1.25]	1.7e-09
rs7652520	3	12192627	G	C	1.18 [1.11-1.25]	1.7e-08
rs10433537	3	12198485	A	T	1.18 [1.11-1.25]	1.6e-08
rs13070993	3	12217797	C	T	1.17 [1.1-1.25]	2e-07
rs7637403	3	12242488	G	A	1.1 [1.06-1.15]	4.7e-06
rs13099882	3	12250888	A	G	1.1 [1.06-1.15]	5e-06
rs11720578	3	12267084	G	T	1.15 [1.08-1.23]	1.2e-05
rs13071168	3	12275447	G	A	1.16 [1.09-1.22]	4.8e-07
rs11709119	3	12276493	G	T	1.16 [1.09-1.23]	4.2e-07
rs17036101	3	12277845	G	A	1.16 [1.1-1.23]	2.6e-07
rs17036130	3	12288288	G	A	1.16 [1.1-1.23]	5.4e-08
rs1596417	3	12290898	A	T	1.16 [1.1-1.22]	1.4e-07
rs9875338	3	12296469	G	A	1.05 [1.02-1.08]	0.00041
rs13089415	3	12301360	G	T	1.15 [1.09-1.22]	4.7e-07
rs6771792	3	12301472	C	T	1.17 [1.11-1.24]	1.9e-08
rs6809631	3	12335647	A	T	1.05 [1.02-1.09]	0.0013
rs6785890	3	12335816	C	A	1.06 [1.03-1.09]	2.7e-05
rs11709077	3	12336507	G	A	1.15 [1.1-1.2]	1e-10
rs6768587	3	12338115	A	G	1.05 [1.02-1.08]	0.0002
rs4684846	3	12338849	A	G	1.06 [1.03-1.09]	8.9e-05
rs9817428	3	12340267	C	A	1.06 [1.03-1.09]	2.3e-05
rs12631028	3	12341406	C	T	1.06 [1.03-1.09]	0.00014
rs12636461	3	12341830	A	G	1.06 [1.03-1.09]	0.00021
rs13076055	3	12341996	G	A	1.05 [1.03-1.08]	0.00014
rs11710969	3	12343591	G	A	1.06 [1.03-1.08]	5.5e-05
rs11128597	3	12344636	A	G	1.06 [1.03-1.08]	4.8e-05
rs10510411	3	12346849	G	A	1.05 [1.02-1.08]	0.001
rs10510412	3	12346962	G	A	1.05 [1.02-1.08]	0.00069
rs17036242	3	12349490	G	A	1.05 [1.02-1.08]	0.00097
rs13061415	3	12349924	T	C	1.05 [1.02-1.08]	0.00021
rs12639162	3	12350781	A	G	1.05 [1.02-1.08]	0.00071
rs12629240	3	12351574	A	G	1.05 [1.02-1.08]	0.00068
rs9310401	3	12352468	T	C	1.05 [1.02-1.08]	0.00067
rs11715073	3	12352971	C	G	1.06 [1.03-1.09]	1.9e-05
rs10865710	3	12353198	C	G	1.05 [1.02-1.08]	0.00032
rs11128598	3	12353326	T	C	1.06 [1.03-1.09]	1.5e-05
rs13095716	3	12353612	T	A	1.05 [1.02-1.08]	0.00072
rs13073869	3	12353993	G	A	1.05 [1.02-1.08]	0.00076
rs12496505	3	12356158	G	A	1.05 [1.02-1.08]	0.00084
rs12487012	3	12356196	T	C	1.05 [1.02-1.08]	0.0011
rs13070963	3	12356605	T	C	1.05 [1.02-1.08]	0.00084
rs13433696	3	12358492	G	A	1.05 [1.02-1.08]	0.00075
rs2067819	3	12359049	G	A	1.09 [1.05-1.13]	1.2e-06
rs12636454	3	12360214	T	C	1.05 [1.02-1.08]	0.0013
rs12493718	3	12363637	G	T	1.06 [1.03-1.09]	1.4e-05
rs13083375	3	12365308	G	T	1.14 [1.09-1.19]	2.8e-09
rs13064760	3	12369401	C	T	1.14 [1.09-1.19]	2.7e-09
rs880663	3	12370083	A	G	1.05 [1.02-1.08]	0.00074
rs4145573	3	12372386	A	G	1.05 [1.02-1.08]	0.00055
rs2028760	3	12372882	G	A	1.05 [1.02-1.08]	0.0011
rs17036314	3	12376745	G	C	1.05 [1.02-1.08]	0.0012
rs10510417	3	12377294	C	G	1.05 [1.02-1.08]	0.0013
rs7638903	3	12383714	G	A	1.13 [1.07-1.19]	2.5e-06
rs11128603	3	12385828	A	G	1.15 [1.1-1.21]	1.9e-09
rs4684847	3	12386337	C	T	1.14 [1.09-1.19]	8e-09
rs6802898	3	12391207	C	T	1.13 [1.08-1.18]	5.9e-09
rs7647481	3	12391813	G	A	1.13 [1.09-1.18]	2.7e-09
rs1801282	3	12393125	C	G	1.14 [1.09-1.19]	5.7e-10
rs1899951	3	12394840	C	T	1.14 [1.09-1.18]	2.4e-10
rs2881654	3	12396955	G	A	1.13 [1.09-1.18]	3.4e-09
rs9968122	3	19994271	G	A	1.07 [1.03-1.11]	0.0011
rs7627244	3	23182581	A	C	1.08 [1.04-1.12]	0.00017
rs7630410	3	23183668	A	G	1.07 [1.03-1.11]	0.00073
rs9863600	3	23190832	A	G	1.11 [1.07-1.15]	2.6e-08
rs9830468	3	23191098	G	T	1.1 [1.06-1.14]	3.3e-08
rs6762856	3	23193007	G	A	1.11 [1.07-1.15]	2.4e-09
rs6550732	3	23193690	A	G	1.09 [1.04-1.15]	0.00073
rs4619807	3	23193928	G	A	1.05 [1.02-1.08]	0.00064
rs9809194	3	23194519	A	G	1.14 [1.08-1.2]	1.3e-06
rs9847818	3	23194932	G	A	1.11 [1.06-1.16]	6.2e-06
rs6805790	3	23198758	C	G	1.05 [1.03-1.08]	9e-05
rs6764319	3	23200907	C	A	1.05 [1.03-1.08]	2.9e-05
rs9855620	3	23201290	C	G	1.06 [1.03-1.08]	1.4e-05
rs9812056	3	23204024	T	C	1.09 [1.06-1.13]	5.4e-08
rs13314285	3	23212575	C	A	1.11 [1.08-1.15]	1.4e-09
rs9831921	3	23216324	C	A	1.1 [1.06-1.13]	2.3e-07
rs11710420	3	23221931	A	G	1.06 [1.03-1.09]	3.5e-05
rs11927173	3	23225194	T	C	1.12 [1.08-1.16]	4.2e-10
rs2014132	3	23234339	T	C	1.16 [1.09-1.22]	6.7e-07
rs17012800	3	23235424	A	G	1.12 [1.08-1.16]	1.3e-09
rs2291720	3	23237189	G	A	1.14 [1.08-1.2]	4.6e-06
rs1495130	3	23241009	C	G	1.12 [1.08-1.16]	2.7e-10
rs1552931	3	23248486	G	A	1.06 [1.02-1.09]	0.00057
rs17012823	3	23259724	G	C	1.14 [1.08-1.2]	8.3e-07
rs17012834	3	23262290	T	C	1.16 [1.09-1.23]	3.9e-07
rs17012844	3	23269591	G	A	1.16 [1.1-1.23]	3.4e-07
rs10510536	3	23269770	T	C	1.11 [1.07-1.14]	3.2e-09
rs1495134	3	23270047	A	C	1.05 [1.02-1.08]	0.00057
rs17012852	3	23270561	A	G	1.16 [1.1-1.23]	3.3e-07
rs17012861	3	23275053	G	A	1.16 [1.1-1.23]	3e-07
rs9841308	3	23279307	T	C	1.07 [1.04-1.1]	1.4e-07
rs1390083	3	23299166	A	T	1.06 [1.02-1.09]	0.00042
rs6771206	3	23301213	G	A	1.07 [1.04-1.09]	8.3e-07
rs17012927	3	23312063	G	A	1.16 [1.09-1.23]	2.7e-06
rs2884787	3	23312956	C	T	1.07 [1.04-1.1]	1.6e-07
rs17012943	3	23317924	A	T	1.16 [1.1-1.23]	2.5e-07
rs10510537	3	23321920	A	C	1.16 [1.1-1.23]	2.6e-07
rs1495133	3	23322679	A	G	1.05 [1.02-1.07]	0.0012
rs7641764	3	23326505	C	G	1.07 [1.04-1.1]	2.9e-07
rs17012959	3	23332784	G	T	1.11 [1.05-1.17]	0.00026
rs7613969	3	23333023	A	G	1.07 [1.04-1.1]	3.6e-07
rs7612463	3	23336450	C	A	1.1 [1.07-1.14]	6.7e-09
rs6792462	3	23337633	G	A	1.06 [1.04-1.09]	2.2e-06
rs2055155	3	23343192	A	G	1.07 [1.04-1.1]	1.9e-06
rs7629327	3	23343762	A	G	1.07 [1.04-1.1]	1e-05
rs17012969	3	23344383	T	C	1.16 [1.1-1.23]	1.8e-07
rs7632520	3	23344838	A	G	1.07 [1.04-1.1]	8.5e-07
rs12636682	3	23345684	A	G	1.06 [1.03-1.1]	3.5e-05
rs7648425	3	23346407	G	C	1.07 [1.04-1.1]	1.5e-06
rs7627380	3	23346795	C	T	1.09 [1.06-1.13]	1.1e-07
rs17012988	3	23349775	G	A	1.16 [1.1-1.23]	3.2e-07
rs6790185	3	23352223	G	A	1.06 [1.02-1.09]	0.00056
rs7651175	3	23357695	G	A	1.07 [1.04-1.1]	6e-07
rs17012998	3	23360627	G	T	1.16 [1.09-1.23]	4.3e-07
rs17013003	3	23361463	C	T	1.16 [1.09-1.23]	4.4e-07
rs12185989	3	23363050	C	T	1.07 [1.04-1.1]	1e-05
rs11921580	3	23364918	C	T	1.07 [1.04-1.1]	3.8e-07
rs6806387	3	23369029	C	G	1.06 [1.02-1.09]	0.00042
rs9848331	3	23370914	G	A	1.12 [1.06-1.19]	5.7e-05
rs17013026	3	23375083	G	A	1.15 [1.08-1.22]	4.9e-06
rs17013029	3	23378027	G	A	1.16 [1.09-1.23]	3.2e-06
rs17013035	3	23383068	G	C	1.16 [1.1-1.23]	2.8e-07
rs17013049	3	23385942	T	G	1.13 [1.07-1.19]	4.3e-06
rs6778478	3	23398574	G	C	1.07 [1.04-1.1]	5e-07
rs17013116	3	23400417	G	T	1.16 [1.1-1.23]	3.1e-07
rs17013125	3	23401528	G	C	1.16 [1.1-1.23]	2.8e-07
rs17013128	3	23401596	T	G	1.16 [1.1-1.23]	3e-07
rs2047340	3	23402038	G	A	1.06 [1.03-1.09]	0.00025
rs6550761	3	23415782	G	C	1.07 [1.04-1.1]	1.5e-06
rs1908772	3	23418419	T	G	1.07 [1.04-1.1]	7.2e-07
rs17013152	3	23419945	G	C	1.14 [1.07-1.21]	2.7e-05
rs2173058	3	23445491	A	G	1.1 [1.07-1.14]	1.5e-08
rs6807788	3	23453798	T	C	1.07 [1.04-1.1]	6.3e-07
rs1496653	3	23454790	A	G	1.1 [1.07-1.13]	3.3e-10
rs7613185	3	23455464	T	C	1.11 [1.07-1.14]	4.3e-09
rs13094957	3	23457080	T	C	1.1 [1.07-1.14]	4.8e-10
rs7627525	3	23465159	T	C	1.1 [1.07-1.14]	1.7e-08
rs778493	3	23466101	T	G	1.05 [1.02-1.08]	0.00031
rs7628372	3	23466255	A	C	1.11 [1.07-1.15]	2.8e-09
rs2359765	3	23467773	G	A	1.1 [1.06-1.14]	2e-08
rs2359766	3	23467832	A	G	1.11 [1.07-1.15]	7.9e-09
rs9883870	3	23470920	A	G	1.1 [1.06-1.14]	1.1e-07
rs4340647	3	23471072	T	G	1.1 [1.06-1.13]	1.6e-07
rs704534	3	23473346	T	C	1.06 [1.02-1.09]	0.00075
rs17013216	3	23476008	T	C	1.16 [1.1-1.23]	1.5e-07
rs17013219	3	23476115	G	T	1.16 [1.09-1.23]	1.3e-06
rs17013223	3	23476407	G	A	1.16 [1.1-1.23]	1.6e-07
rs778498	3	23477816	G	C	1.05 [1.03-1.08]	5.8e-05
rs17013245	3	23482375	G	A	1.15 [1.09-1.21]	3.1e-07
rs1692622	3	23487100	A	C	1.05 [1.02-1.08]	7e-05
rs17013266	3	23490881	A	G	1.08 [1.05-1.12]	7.3e-06
rs9836574	3	23493521	G	C	1.04 [1.02-1.07]	0.001
rs7610906	3	23494496	C	A	1.07 [1.05-1.1]	8.7e-08
rs778524	3	23494512	G	A	1.06 [1.03-1.09]	1.1e-05
rs2359768	3	23495258	A	G	1.1 [1.06-1.14]	1.7e-07
rs17013286	3	23496134	T	C	1.16 [1.1-1.23]	1.6e-07
rs3111310	3	23509597	A	G	1.04 [1.02-1.07]	0.001
rs1985664	3	23511842	G	A	1.16 [1.09-1.23]	1.2e-06
rs17013320	3	23513056	G	T	1.15 [1.09-1.21]	3.2e-07
rs1007332	3	23513859	A	G	1.12 [1.06-1.18]	6.4e-05
rs17013322	3	23517847	C	T	1.15 [1.08-1.21]	1.4e-06
rs13323077	3	23520741	G	A	1.06 [1.03-1.09]	1e-05
rs1695192	3	23522003	C	G	1.07 [1.04-1.1]	6.7e-06
rs1692647	3	23522809	C	A	1.07 [1.04-1.1]	5.7e-06
rs17013333	3	23523106	T	G	1.16 [1.1-1.23]	1.4e-07
rs1695203	3	23524033	C	T	1.06 [1.03-1.09]	1.1e-05
rs17013344	3	23525461	A	G	1.16 [1.1-1.23]	1.6e-07
rs17013348	3	23525997	A	G	1.16 [1.1-1.23]	1.6e-07
rs778520	3	23527119	A	G	1.06 [1.03-1.09]	1.3e-05
rs801277	3	23529021	C	T	1.07 [1.04-1.1]	5e-06
rs778515	3	23529260	T	C	1.06 [1.03-1.09]	1.3e-05
rs7640458	3	23530097	A	G	1.07 [1.04-1.1]	1.4e-06
rs9812300	3	23531119	A	G	1.07 [1.04-1.1]	1.2e-06
rs7646541	3	23534073	C	G	1.06 [1.03-1.09]	0.00028
rs1995175	3	23535928	G	A	1.06 [1.04-1.09]	9.3e-06
rs9631541	3	23539779	G	A	1.06 [1.03-1.09]	7.5e-06
rs1011754	3	23541057	G	A	1.14 [1.08-1.2]	1.6e-06
rs17013383	3	23547371	T	A	1.15 [1.09-1.22]	5.5e-07
rs17013390	3	23556924	C	T	1.14 [1.08-1.21]	2.7e-06
rs17013398	3	23558623	T	C	1.17 [1.1-1.24]	4.1e-07
rs17013406	3	23560460	G	A	1.17 [1.1-1.24]	3.9e-07
rs17013409	3	23563599	G	A	1.17 [1.1-1.24]	3.6e-07
rs1463835	3	23564611	C	A	1.12 [1.06-1.19]	0.00012
rs7632814	3	23567289	T	G	1.07 [1.04-1.1]	1.2e-05
rs4574222	3	23571836	G	C	1.17 [1.1-1.24]	3.4e-07
rs17013418	3	23572649	C	T	1.17 [1.1-1.24]	3.5e-07
rs17013422	3	23576101	T	C	1.17 [1.1-1.24]	1.6e-07
rs17013429	3	23577554	C	T	1.15 [1.09-1.22]	8.2e-07
rs17013433	3	23578594	A	G	1.15 [1.09-1.21]	5e-07
rs7631705	3	23632234	T	C	1.06 [1.03-1.09]	0.00047
rs11914576	3	23634913	T	C	1.06 [1.02-1.09]	0.00066
rs4858528	3	23734178	G	A	1.06 [1.02-1.09]	0.0014
rs4561795	3	25046468	T	G	1.28 [1.11-1.48]	0.001
rs322681	3	25329792	C	G	1.05 [1.02-1.08]	0.0011
rs322680	3	25329833	G	A	1.05 [1.02-1.08]	0.00082
rs4973869	3	27337929	G	A	1.05 [1.02-1.08]	0.0012
rs1563656	3	28520417	A	T	1.05 [1.03-1.08]	0.00013
rs4398387	3	28579788	A	G	1.04 [1.02-1.07]	0.00075
rs17722536	3	29459355	T	C	1.15 [1.06-1.24]	0.00066
rs1354283	3	30904250	T	C	1.04 [1.02-1.07]	0.0012
rs4955348	3	30904844	T	C	1.04 [1.02-1.07]	0.0013
rs2885141	3	36572647	A	T	1.07 [1.03-1.12]	0.0013
rs9849555	3	36968309	T	C	1.07 [1.03-1.1]	0.0003
rs6781369	3	40047420	G	A	1.09 [1.03-1.14]	0.0012
rs9811587	3	40053773	C	A	1.08 [1.03-1.13]	0.0014
rs9825940	3	40054581	A	C	1.08 [1.03-1.13]	0.0013
rs854222	3	45397986	C	A	1.07 [1.04-1.1]	1.3e-05
rs2159894	3	45398042	G	A	1.05 [1.02-1.08]	0.00038
rs854224	3	45398878	G	T	1.06 [1.03-1.09]	9.3e-05
rs13086975	3	45402240	G	A	1.06 [1.02-1.09]	0.00062
rs6793155	3	45405467	C	T	1.05 [1.02-1.08]	0.0006
rs11917934	3	45405907	G	A	1.05 [1.03-1.08]	0.00012
rs7641414	3	45407170	C	T	1.05 [1.02-1.08]	0.00054
rs17637580	3	45436473	A	G	1.06 [1.02-1.09]	0.00061
rs854202	3	45460914	C	T	1.05 [1.02-1.08]	0.00094
rs9829227	3	46666521	T	C	1.07 [1.03-1.11]	0.0013
rs3796369	3	46667110	A	G	1.07 [1.03-1.11]	0.00071
rs3796370	3	46667183	C	A	1.08 [1.03-1.12]	0.00067
rs9834713	3	46667688	T	C	1.06 [1.03-1.11]	0.0009
rs9835025	3	46667880	T	C	1.06 [1.03-1.1]	0.0008
rs11915788	3	46668254	G	T	1.06 [1.03-1.1]	0.00081
rs9820372	3	46668877	C	G	1.07 [1.03-1.11]	0.0006
rs9820785	3	46668997	G	A	1.06 [1.03-1.1]	0.00081
rs9820845	3	46669177	C	G	1.06 [1.03-1.1]	0.00085
rs9820861	3	46669194	C	G	1.07 [1.03-1.11]	0.00038
rs9821418	3	46669322	G	A	1.06 [1.03-1.1]	0.00097
rs9841203	3	46669349	T	C	1.06 [1.03-1.1]	0.00098
rs9864097	3	46670363	A	G	1.07 [1.03-1.11]	0.00055
rs9856564	3	46671931	T	C	1.08 [1.04-1.13]	0.00015
rs9836761	3	46672184	C	G	1.07 [1.03-1.12]	0.00038
rs9837085	3	46672372	C	G	1.07 [1.03-1.12]	0.0004
rs7623109	3	46672534	C	A	1.07 [1.03-1.12]	0.0004
rs4683255	3	46679881	T	C	1.07 [1.03-1.11]	0.00082
rs11709936	3	46680483	G	C	1.04 [1.02-1.07]	0.0011
rs7427959	3	46687030	A	G	1.07 [1.03-1.12]	0.00089
rs11713693	3	47074906	T	C	1.05 [1.02-1.07]	0.00097
rs12715421	3	47084859	G	A	1.05 [1.02-1.07]	0.0013
rs6794193	3	47114904	C	T	1.04 [1.02-1.07]	0.0014
rs6785790	3	47146932	T	C	1.04 [1.02-1.07]	0.00097
rs811115	3	47322133	T	C	1.05 [1.02-1.08]	0.00054
rs807936	3	47322496	T	C	1.04 [1.02-1.07]	0.0011
rs1638676	3	47327651	G	A	1.04 [1.02-1.07]	0.0011
rs295441	3	47333295	A	T	1.05 [1.02-1.07]	0.00046
rs807932	3	47354241	T	C	1.05 [1.02-1.07]	0.0011
rs295428	3	47359262	T	G	1.04 [1.02-1.07]	0.0013
rs295461	3	47368010	C	T	1.05 [1.02-1.07]	0.00086
rs2159400	3	47375890	T	C	1.04 [1.02-1.07]	0.0012
rs295458	3	47385585	A	C	1.05 [1.02-1.08]	0.00034
rs807931	3	47389317	T	C	1.04 [1.02-1.07]	0.0011
rs7613282	3	47389409	C	T	1.05 [1.02-1.08]	0.00053
rs11130127	3	47398793	C	G	1.05 [1.02-1.07]	0.00087
rs807810	3	47403892	G	A	1.05 [1.02-1.08]	0.00059
rs11711824	3	47468261	T	C	1.05 [1.02-1.09]	0.0014
rs6792461	3	47473168	C	T	1.05 [1.02-1.07]	0.00081
rs4858856	3	47565424	A	G	1.07 [1.03-1.11]	0.0012
rs7637429	3	50692172	T	C	1.09 [1.04-1.14]	0.00069
rs9831977	3	52854140	T	G	1.09 [1.04-1.15]	0.0011
rs11720228	3	52877270	G	A	1.09 [1.04-1.15]	0.00035
rs13076033	3	52898427	T	C	1.1 [1.04-1.16]	0.00036
rs3796352	3	52913279	C	T	1.09 [1.03-1.14]	0.0012
rs2581810	3	52960859	C	T	1.05 [1.03-1.08]	0.00014
rs2581801	3	52972907	G	T	1.06 [1.03-1.09]	0.00028
rs13072395	3	52980573	T	C	1.09 [1.04-1.15]	0.00072
rs7648514	3	52983246	G	C	1.06 [1.03-1.09]	0.00036
rs6445550	3	52983434	A	G	1.06 [1.03-1.09]	0.00031
rs9865094	3	52985319	G	C	1.06 [1.03-1.08]	0.0001
rs9311485	3	52987645	T	G	1.06 [1.03-1.08]	0.00011
rs2336669	3	52994138	G	A	1.05 [1.02-1.08]	0.001
rs6792578	3	53004604	A	G	1.06 [1.03-1.1]	0.0004
rs6768844	3	53004620	T	C	1.05 [1.02-1.08]	0.001
rs12053904	3	53025837	C	T	1.05 [1.02-1.09]	0.00034
rs2564947	3	53046216	C	T	1.05 [1.02-1.08]	0.00049
rs2581780	3	53058960	C	T	1.08 [1.03-1.12]	0.0013
rs2255107	3	53060637	C	T	1.06 [1.03-1.1]	8.3e-05
rs12633064	3	53061377	T	C	1.05 [1.02-1.09]	0.00075
rs2336725	3	53118739	T	C	1.05 [1.02-1.08]	0.0011
rs2581786	3	53126143	A	G	1.04 [1.02-1.07]	0.0013
rs2163167	3	53131772	C	T	1.04 [1.02-1.07]	0.0011
rs2581830	3	53134098	C	T	1.04 [1.02-1.07]	0.00059
rs1384970	3	53445491	A	G	1.1 [1.04-1.17]	0.00071
rs1825387	3	53449851	A	G	1.1 [1.04-1.17]	0.00064
rs17053078	3	53485719	G	A	1.1 [1.05-1.16]	6.8e-05
rs10510764	3	53485790	G	C	1.08 [1.03-1.14]	0.0014
rs17053081	3	53486112	C	T	1.11 [1.05-1.16]	6.4e-05
rs531193	3	53486831	A	G	1.05 [1.02-1.07]	0.00049
rs17054246	3	54693752	A	G	1.07 [1.03-1.11]	0.00073
rs1491165	3	56487930	G	A	1.05 [1.02-1.08]	0.00062
rs9873381	3	56489776	G	A	1.04 [1.02-1.07]	0.0013
rs2271635	3	58260160	T	C	1.05 [1.02-1.08]	0.001
rs8723	3	58280311	G	A	1.05 [1.03-1.08]	0.00019
rs9986	3	58280406	G	A	1.06 [1.03-1.09]	3.7e-05
rs9862934	3	58281676	G	A	1.05 [1.02-1.08]	0.00023
rs9845705	3	58281868	G	T	1.05 [1.02-1.08]	0.00025
rs7624746	3	58282500	C	T	1.05 [1.02-1.08]	0.00024
rs7622497	3	58282673	C	A	1.06 [1.03-1.08]	6.3e-05
rs7622688	3	58282840	G	A	1.05 [1.02-1.08]	0.00054
rs7622771	3	58282930	G	A	1.06 [1.03-1.08]	6.5e-05
rs17636819	3	58283722	T	C	1.05 [1.03-1.08]	8.6e-05
rs2885868	3	58284692	A	G	1.05 [1.02-1.08]	0.00026
rs12054183	3	58287533	T	C	1.05 [1.02-1.08]	0.00052
rs17355543	3	58292300	T	C	1.05 [1.02-1.08]	0.00046
rs3773012	3	58303069	T	C	1.05 [1.03-1.08]	0.00019
rs10687	3	58305235	T	G	1.05 [1.02-1.08]	0.00079
rs6794330	3	58314756	A	G	1.05 [1.02-1.08]	0.00098
rs12633937	3	58333637	G	A	1.05 [1.02-1.08]	0.00091
rs4553990	3	58381180	A	T	1.06 [1.03-1.09]	0.00029
rs12490706	3	58408247	G	A	1.06 [1.03-1.08]	6.7e-05
rs12631656	3	58409063	C	T	1.05 [1.02-1.08]	0.00073
rs12634132	3	58409082	G	A	1.06 [1.03-1.09]	0.00012
rs12486031	3	58409679	A	G	1.06 [1.03-1.09]	0.00012
rs12492472	3	58409972	C	A	1.06 [1.03-1.09]	0.00011
rs4273385	3	58452867	G	C	1.05 [1.02-1.08]	0.00053
rs17063156	3	60439043	C	T	1.07 [1.03-1.11]	0.00031
rs12496632	3	60512472	C	T	1.13 [1.07-1.19]	3.1e-05
rs17063484	3	60521909	G	T	1.19 [1.11-1.28]	8.2e-07
rs6801782	3	61151781	G	C	1.11 [1.04-1.18]	0.0012
rs959918	3	63077736	G	C	1.09 [1.04-1.15]	0.0011
rs9863596	3	63090682	A	C	1.1 [1.04-1.16]	0.00047
rs980075	3	63095145	T	C	1.1 [1.04-1.16]	0.00054
rs9809380	3	63100356	A	G	1.1 [1.04-1.16]	0.0007
rs9311857	3	63120562	C	G	1.1 [1.04-1.17]	0.0013
rs11130915	3	63130514	G	C	1.09 [1.04-1.15]	0.00081
rs9813741	3	63130869	A	G	1.1 [1.04-1.17]	0.0011
rs7625521	3	63132624	T	G	1.11 [1.05-1.19]	0.00075
rs9823736	3	63138607	G	C	1.1 [1.04-1.17]	0.0013
rs5006758	3	63143552	C	G	1.12 [1.05-1.19]	0.00067
rs12630244	3	63468136	T	C	1.05 [1.02-1.08]	0.0012
rs12488538	3	63469911	T	C	1.05 [1.02-1.08]	0.0012
rs764924	3	63470819	C	T	1.05 [1.02-1.07]	0.0013
rs4257544	3	63473340	T	C	1.05 [1.02-1.08]	0.0013
rs831571	3	64048297	C	T	1.05 [1.02-1.08]	0.00037
rs4616635	3	64702275	C	G	1.08 [1.05-1.12]	2.5e-06
rs9864077	3	64704891	T	C	1.05 [1.02-1.08]	0.0012
rs6795735	3	64705365	C	T	1.05 [1.02-1.08]	0.0002
rs918466	3	64710253	G	A	1.05 [1.02-1.07]	0.00084
rs7428936	3	64710850	T	C	1.05 [1.02-1.08]	0.00028
rs6445425	3	64719091	G	C	1.05 [1.02-1.08]	0.00053
rs7433808	3	64727086	A	T	1.06 [1.03-1.09]	0.00012
rs17676309	3	64730121	C	T	1.06 [1.02-1.09]	0.00041
rs922773	3	66318042	T	C	1.09 [1.04-1.14]	0.00042
rs332387	3	66413111	G	T	1.07 [1.03-1.11]	0.0004
rs4856794	3	66436182	T	G	1.05 [1.02-1.08]	0.0005
rs6787200	3	67693550	C	A	1.05 [1.02-1.09]	0.001
rs7615766	3	67715000	C	G	1.05 [1.02-1.09]	0.0012
rs6549186	3	69211955	T	A	1.47 [1.23-1.76]	2.5e-05
rs6768731	3	69845572	G	C	1.05 [1.02-1.09]	0.0013
rs1430611	3	69853801	C	T	1.05 [1.02-1.09]	0.00068
rs17638562	3	69880713	T	C	1.05 [1.02-1.09]	0.001
rs11921388	3	69900383	G	A	1.06 [1.03-1.1]	0.00032
rs13071701	3	69902514	C	T	1.06 [1.03-1.1]	0.00037
rs6793179	3	69903331	A	C	1.06 [1.02-1.09]	0.00081
rs4676989	3	75064460	C	T	1.23 [1.09-1.39]	0.001
rs4414893	3	75109134	A	T	1.28 [1.1-1.48]	0.0014
rs1528055	3	84081677	G	A	1.05 [1.02-1.08]	0.00063
rs4417877	3	84135545	T	C	1.05 [1.02-1.09]	0.00078
rs4856490	3	84147884	T	C	1.05 [1.02-1.09]	0.0011
rs9868383	3	84148518	C	T	1.04 [1.02-1.07]	0.0014
rs11706737	3	84148974	T	C	1.06 [1.02-1.09]	0.00096
rs6800974	3	84155426	T	C	1.04 [1.02-1.07]	0.0013
rs7639983	3	84158052	C	T	1.04 [1.02-1.07]	0.0013
rs4402946	3	84164563	G	T	1.06 [1.02-1.09]	0.00086
rs4563424	3	84170247	C	T	1.06 [1.02-1.09]	0.00093
rs4465954	3	84170479	T	G	1.05 [1.02-1.08]	0.00036
rs12632312	3	84174125	A	T	1.06 [1.02-1.09]	0.00092
rs4856243	3	84179367	C	G	1.06 [1.02-1.09]	0.0013
rs4284994	3	84182649	T	C	1.04 [1.02-1.07]	0.00088
rs4856244	3	84184134	T	C	1.06 [1.02-1.09]	0.00093
rs7619096	3	84199075	A	C	1.05 [1.03-1.08]	0.00015
rs12635351	3	84200331	G	C	1.05 [1.02-1.09]	0.0012
rs6767473	3	84200533	T	C	1.05 [1.02-1.07]	0.00023
rs11707330	3	84200943	A	G	1.05 [1.02-1.09]	0.00054
rs9831198	3	84206541	C	T	1.05 [1.03-1.08]	8.3e-05
rs4488845	3	84208546	A	G	1.04 [1.02-1.07]	0.0007
rs4856492	3	84215441	G	A	1.05 [1.02-1.09]	0.00098
rs11127836	3	84216109	T	A	1.05 [1.03-1.08]	6.6e-05
rs4618233	3	84216714	G	A	1.05 [1.02-1.09]	0.00075
rs4473566	3	84217984	G	A	1.05 [1.03-1.08]	5.8e-05
rs6548938	3	84227795	A	G	1.05 [1.02-1.07]	0.0003
rs6548940	3	84233286	T	C	1.05 [1.02-1.08]	0.00011
rs12630901	3	84259667	G	A	1.05 [1.02-1.08]	0.00077
rs6777864	3	84277642	G	A	1.04 [1.02-1.07]	0.0012
rs6548947	3	84293654	G	C	1.04 [1.02-1.07]	0.0012
rs7617594	3	84296569	T	C	1.04 [1.02-1.07]	0.00055
rs11127841	3	84479070	G	A	1.05 [1.02-1.08]	0.0013
rs12632655	3	84480665	G	A	1.07 [1.03-1.1]	0.00042
rs8178610	3	93646396	C	T	1.04 [1.02-1.07]	0.00079
rs13099884	3	93903598	A	C	1.05 [1.02-1.08]	0.00046
rs16839759	3	93903910	G	A	1.06 [1.03-1.09]	0.00025
rs12485419	3	93949571	A	G	1.05 [1.02-1.08]	0.00057
rs4241462	3	93967206	A	C	1.05 [1.03-1.08]	0.00012
rs9815406	3	93974279	T	C	1.06 [1.03-1.08]	2.7e-05
rs930813	3	93978062	G	C	1.05 [1.02-1.08]	0.00016
rs13079023	3	93997558	G	A	1.04 [1.02-1.07]	0.001
rs1584928	3	94008159	G	T	1.04 [1.02-1.06]	0.0014
rs1598226	3	94015810	A	G	1.04 [1.02-1.07]	0.0014
rs1598223	3	94016563	G	A	1.04 [1.02-1.07]	0.0013
rs3887491	3	94020375	A	G	1.04 [1.02-1.07]	0.00097
rs1598221	3	94021216	A	T	1.04 [1.02-1.07]	0.0013
rs4857071	3	94028192	T	C	1.05 [1.02-1.08]	0.00035
rs9847884	3	94031084	T	C	1.04 [1.02-1.07]	0.00068
rs11714440	3	95714762	C	T	1.05 [1.02-1.08]	0.00095
rs4642148	3	95723140	C	T	1.05 [1.02-1.08]	0.0012
rs13318012	3	106674944	C	T	1.07 [1.03-1.11]	0.0009
rs1609285	3	106883587	T	C	1.13 [1.05-1.2]	0.00045
rs2138612	3	107145632	G	T	1.59 [1.21-2.08]	0.00096
rs2950977	3	111025557	T	C	1.12 [1.04-1.2]	0.0014
rs16861157	3	113261704	G	A	1.08 [1.03-1.14]	0.00076
rs6438234	3	114913508	G	A	1.05 [1.02-1.08]	0.00029
rs1459517	3	114969156	G	A	1.05 [1.02-1.08]	0.0012
rs3972692	3	116658865	C	T	1.05 [1.02-1.08]	0.0012
rs4109403	3	116749883	G	T	1.06 [1.03-1.1]	0.00087
rs7373301	3	116750564	A	G	1.06 [1.03-1.1]	0.00087
rs6801409	3	116771107	G	A	1.09 [1.05-1.14]	7.7e-05
rs4676784	3	120166243	T	C	1.21 [1.08-1.36]	0.00096
rs2202127	3	121988355	G	A	1.04 [1.02-1.07]	0.0011
rs6807089	3	123064089	T	C	1.05 [1.02-1.08]	0.00029
rs11708067	3	123065778	A	G	1.1 [1.07-1.14]	1.4e-08
rs11708903	3	123066010	A	G	1.05 [1.02-1.08]	0.00055
rs4470442	3	123068024	G	A	1.05 [1.03-1.09]	0.00024
rs7613951	3	123070517	C	T	1.09 [1.05-1.14]	7.4e-05
rs1456116	3	123084379	G	A	1.05 [1.02-1.07]	0.0011
rs2124500	3	123093530	C	T	1.1 [1.06-1.13]	1.9e-07
rs2877716	3	123094451	C	T	1.09 [1.05-1.12]	2.3e-07
rs6798189	3	123095312	G	A	1.09 [1.05-1.13]	2.2e-06
rs9883204	3	123096820	C	T	1.1 [1.06-1.14]	9.4e-08
rs4678041	3	123261968	T	C	1.06 [1.02-1.09]	0.0014
rs2291083	3	124488101	T	A	1.15 [1.06-1.25]	0.0014
rs7650893	3	124533315	T	C	1.08 [1.03-1.14]	0.001
rs6801517	3	124918879	T	C	1.05 [1.02-1.08]	0.00096
rs4679370	3	124919777	C	T	1.05 [1.02-1.08]	0.00029
rs12634352	3	124940905	C	T	1.06 [1.03-1.09]	5.2e-05
rs6801477	3	124941784	A	C	1.06 [1.03-1.09]	4.7e-05
rs7623968	3	124942470	C	T	1.06 [1.03-1.09]	5.1e-05
rs936080	3	124943890	G	A	1.05 [1.03-1.08]	9e-05
rs936079	3	124944143	T	C	1.06 [1.03-1.09]	5.1e-05
rs2292803	3	124945744	T	G	1.06 [1.03-1.09]	5.1e-05
rs13573	3	124948396	C	T	1.06 [1.03-1.08]	9.3e-05
rs4679372	3	124948552	G	A	1.06 [1.03-1.09]	5.7e-05
rs1053738	3	124951821	C	T	1.05 [1.03-1.08]	0.00011
rs7619480	3	124953320	A	T	1.06 [1.03-1.09]	5.2e-05
rs9882766	3	124958527	G	T	1.06 [1.03-1.09]	5.5e-05
rs11914990	3	124959337	C	G	1.06 [1.03-1.08]	0.00012
rs6438885	3	124960842	C	T	1.05 [1.02-1.08]	0.00021
rs2168237	3	124961980	C	T	1.06 [1.03-1.09]	3.5e-05
rs9870428	3	124962992	A	C	1.06 [1.03-1.08]	6.7e-05
rs9859543	3	124964769	T	A	1.06 [1.03-1.09]	3.2e-05
rs1850506	3	124965928	T	C	1.05 [1.02-1.08]	0.00034
rs11709450	3	124967313	G	A	1.06 [1.03-1.08]	6.4e-05
rs4679161	3	124969022	A	C	1.06 [1.03-1.08]	7.2e-05
rs9857356	3	124969453	T	C	1.06 [1.03-1.08]	0.00011
rs6438887	3	124971233	G	A	1.06 [1.03-1.09]	4.8e-05
rs9858524	3	124973298	C	T	1.06 [1.03-1.09]	5e-05
rs6784650	3	124974390	C	T	1.06 [1.03-1.08]	0.00011
rs4679373	3	124976030	G	A	1.06 [1.03-1.09]	5.1e-05
rs4450756	3	124976469	T	A	1.06 [1.03-1.08]	0.00011
rs6438888	3	124977300	A	G	1.06 [1.03-1.09]	4e-05
rs6438889	3	124977429	C	T	1.06 [1.03-1.09]	5.6e-05
rs6810205	3	124977651	T	C	1.05 [1.03-1.08]	0.00015
rs4679375	3	124978025	G	C	1.05 [1.02-1.09]	0.0013
rs1961457	3	124980350	T	A	1.06 [1.03-1.08]	7.7e-05
rs1607238	3	124981635	T	C	1.05 [1.02-1.08]	0.00016
rs4679162	3	124981935	T	C	1.05 [1.03-1.08]	0.00012
rs4679163	3	124982029	T	C	1.05 [1.02-1.08]	0.00028
rs6772299	3	124990027	C	A	1.05 [1.02-1.08]	0.0002
rs1999919	3	124990545	G	T	1.05 [1.03-1.08]	9.6e-05
rs1999920	3	124990713	C	T	1.05 [1.03-1.08]	9.2e-05
rs1999921	3	124990838	G	A	1.06 [1.03-1.09]	4e-05
rs6781706	3	124990888	A	G	1.05 [1.02-1.08]	0.00026
rs7615139	3	124994187	C	T	1.06 [1.03-1.09]	5.8e-05
rs1455051	3	124999627	C	T	1.06 [1.03-1.08]	0.00012
rs9879936	3	125000331	A	G	1.06 [1.03-1.08]	7.6e-05
rs4679379	3	125000909	C	A	1.06 [1.03-1.09]	0.00011
rs1338543	3	125002175	T	C	1.06 [1.03-1.09]	6e-05
rs2066042	3	125002564	G	A	1.06 [1.03-1.09]	6.1e-05
rs1349972	3	125002953	G	T	1.06 [1.03-1.08]	6.5e-05
rs2039718	3	125003517	C	A	1.05 [1.02-1.08]	0.00016
rs1869673	3	125006520	T	C	1.05 [1.03-1.08]	0.00011
rs9850300	3	125008177	T	C	1.05 [1.03-1.08]	0.00013
rs9840737	3	125009910	G	A	1.06 [1.03-1.09]	9.5e-05
rs987956	3	125010064	A	C	1.05 [1.02-1.08]	0.00025
rs9818938	3	125013069	A	G	1.06 [1.03-1.08]	6.6e-05
rs9860377	3	125015830	T	C	1.06 [1.03-1.09]	4.9e-05
rs1817183	3	125027314	G	A	1.05 [1.02-1.08]	0.00017
rs7612285	3	125028360	C	A	1.05 [1.02-1.08]	0.00013
rs4679382	3	125028649	C	T	1.05 [1.02-1.08]	0.00031
rs1975760	3	125030381	T	C	1.05 [1.02-1.08]	0.00015
rs9858336	3	125031004	A	G	1.06 [1.03-1.08]	6.8e-05
rs6767136	3	125034084	C	T	1.05 [1.03-1.08]	9.5e-05
rs7642600	3	125036353	A	C	1.05 [1.02-1.08]	0.00037
rs7620704	3	125036439	C	T	1.05 [1.03-1.08]	0.00017
rs7635104	3	125036882	T	C	1.05 [1.02-1.08]	0.00035
rs11711167	3	125039019	C	T	1.05 [1.03-1.08]	0.00013
rs9855330	3	125039106	T	C	1.06 [1.03-1.08]	6.5e-05
rs4386447	3	125041974	T	C	1.06 [1.03-1.08]	9.1e-05
rs4679167	3	125043267	A	C	1.06 [1.03-1.08]	9.1e-05
rs6780042	3	125043337	C	T	1.06 [1.03-1.08]	7.7e-05
rs9844360	3	125046051	C	T	1.06 [1.03-1.08]	8.9e-05
rs4679385	3	125048505	T	C	1.06 [1.03-1.08]	8e-05
rs6808899	3	125053272	T	C	1.06 [1.03-1.08]	8e-05
rs9882663	3	125053692	C	A	1.06 [1.03-1.08]	8.1e-05
rs9849383	3	125054174	A	T	1.06 [1.03-1.08]	8.9e-05
rs4679387	3	125057661	T	C	1.05 [1.03-1.08]	0.00015
rs6438895	3	125058932	T	G	1.06 [1.03-1.08]	8e-05
rs6438896	3	125058994	C	T	1.05 [1.03-1.08]	0.00011
rs6438897	3	125059233	A	G	1.06 [1.03-1.08]	8.7e-05
rs6787332	3	125062667	A	G	1.06 [1.03-1.08]	6.7e-05
rs6438898	3	125063986	T	C	1.06 [1.03-1.09]	2.9e-05
rs2333197	3	125065377	A	C	1.06 [1.03-1.08]	6.8e-05
rs4303833	3	125066226	G	A	1.05 [1.02-1.08]	0.00068
rs9289250	3	125067174	G	C	1.05 [1.02-1.08]	0.00019
rs9835788	3	125069504	C	T	1.05 [1.03-1.08]	0.00011
rs12695453	3	125073311	T	C	1.06 [1.03-1.09]	2.7e-05
rs7609684	3	125075013	A	C	1.05 [1.02-1.08]	0.0004
rs7609964	3	125075300	A	G	1.06 [1.03-1.09]	2.5e-05
rs13086821	3	125081421	C	T	1.06 [1.03-1.09]	3.7e-05
rs2333200	3	125081694	T	C	1.06 [1.03-1.09]	6.7e-05
rs7620749	3	125148476	A	G	1.06 [1.03-1.1]	0.00062
rs6439168	3	129050943	A	G	1.05 [1.02-1.09]	0.0013
rs6806453	3	131718729	C	T	1.08 [1.05-1.12]	1.7e-06
rs16838287	3	131729449	A	G	1.08 [1.05-1.12]	2.4e-06
rs6802764	3	131732420	T	C	1.05 [1.02-1.08]	0.00036
rs9834304	3	131736873	A	T	1.06 [1.03-1.09]	6.9e-05
rs9857169	3	131750762	T	G	1.06 [1.03-1.1]	2.8e-05
rs7631156	3	131751628	A	G	1.06 [1.03-1.09]	3e-05
rs13076253	3	131751775	C	A	1.09 [1.05-1.14]	3.8e-06
rs2178385	3	131753297	T	G	1.07 [1.04-1.1]	1.8e-05
rs7649058	3	131753688	C	T	1.07 [1.03-1.1]	2.1e-05
rs16838395	3	131755693	A	G	1.07 [1.04-1.11]	3.6e-05
rs1320903	3	131758077	A	G	1.06 [1.03-1.09]	3e-05
rs7645921	3	131761781	T	C	1.06 [1.03-1.1]	2.4e-05
rs10512832	3	131776525	A	T	1.07 [1.03-1.1]	2.6e-05
rs9839482	3	131776912	A	G	1.07 [1.03-1.1]	3.2e-05
rs9840453	3	131777465	T	G	1.08 [1.05-1.12]	3.1e-06
rs1976992	3	131779012	A	G	1.08 [1.05-1.12]	2e-06
rs10470437	3	131782733	T	A	1.06 [1.03-1.09]	0.00019
rs6792706	3	131783593	A	G	1.08 [1.05-1.12]	1.2e-06
rs2951398	3	131786594	C	A	1.04 [1.02-1.07]	0.0011
rs1920003	3	131787074	T	C	1.04 [1.02-1.07]	0.0011
rs1920004	3	131787280	C	A	1.05 [1.02-1.07]	0.00076
rs2141571	3	131788239	C	T	1.04 [1.02-1.07]	0.0013
rs2141572	3	131788366	A	G	1.07 [1.04-1.11]	6.9e-06
rs9842509	3	131789864	G	A	1.06 [1.03-1.09]	0.00026
rs9831235	3	131791529	G	T	1.08 [1.04-1.11]	8.8e-06
rs1112219	3	131792312	G	C	1.07 [1.04-1.11]	3e-05
rs1112218	3	131792411	G	C	1.06 [1.03-1.1]	0.00017
rs6439340	3	131797500	C	A	1.06 [1.03-1.1]	0.00031
rs2369369	3	131797998	A	G	1.06 [1.03-1.1]	0.00065
rs6765085	3	131801556	C	T	1.06 [1.03-1.1]	0.00028
rs10470324	3	131802034	C	T	1.06 [1.03-1.09]	0.00032
rs7651640	3	131803852	C	G	1.06 [1.03-1.1]	0.00056
rs13093947	3	131804888	T	C	1.07 [1.03-1.11]	0.00046
rs6775745	3	131813900	A	G	1.06 [1.02-1.09]	0.00084
rs309995	3	132076150	A	G	1.35 [1.15-1.58]	0.0002
rs1874883	3	134205071	G	T	1.06 [1.02-1.09]	0.00045
rs811322	3	138329862	G	A	1.05 [1.02-1.08]	0.0012
rs361074	3	138346829	G	A	1.05 [1.02-1.08]	0.0012
rs6766967	3	140179854	G	A	1.05 [1.02-1.08]	0.0014
rs6439929	3	140180600	A	C	1.05 [1.02-1.08]	0.001
rs6440003	3	141094209	G	A	1.04 [1.02-1.07]	0.0013
rs6764769	3	141100280	A	G	1.04 [1.02-1.07]	0.001
rs6763931	3	141102833	G	A	1.05 [1.02-1.07]	0.00068
rs724016	3	141105570	A	G	1.04 [1.02-1.07]	0.0011
rs7632381	3	141106063	T	C	1.04 [1.02-1.07]	0.00095
rs1344674	3	141125186	A	G	1.04 [1.02-1.07]	0.0011
rs9825379	3	141137035	G	A	1.08 [1.03-1.13]	0.0013
rs6763927	3	141140366	A	T	1.05 [1.02-1.08]	0.00063
rs9876694	3	141152017	C	T	1.18 [1.09-1.28]	2.2e-05
rs6768399	3	143544055	A	T	1.22 [1.08-1.38]	0.0011
rs10513239	3	143727326	G	C	1.07 [1.03-1.12]	0.0013
rs7624601	3	144807323	C	T	1.11 [1.04-1.18]	0.00089
rs11709794	3	144832516	G	A	1.07 [1.03-1.12]	0.0014
rs11708318	3	147376672	T	C	1.05 [1.02-1.09]	0.001
rs12486232	3	147391088	A	G	1.05 [1.02-1.08]	0.00091
rs2934083	3	148484866	G	A	1.05 [1.02-1.08]	0.00065
rs2934114	3	148490281	C	T	1.05 [1.02-1.07]	0.0014
rs2934115	3	148491096	T	C	1.05 [1.02-1.08]	0.00071
rs2933262	3	148492257	T	C	1.05 [1.02-1.08]	0.00057
rs2934116	3	148492396	G	A	1.05 [1.02-1.08]	0.00056
rs1806332	3	148492760	T	C	1.05 [1.02-1.08]	0.00055
rs12496373	3	148497051	G	A	1.05 [1.02-1.08]	0.00079
rs3796195	3	148497276	G	C	1.05 [1.02-1.08]	0.00059
rs7636643	3	150049780	T	A	1.09 [1.03-1.14]	0.0013
rs4680006	3	150585469	T	C	1.05 [1.02-1.08]	0.0006
rs6440819	3	152337226	C	T	1.05 [1.03-1.08]	6.8e-05
rs6766179	3	152337618	T	G	1.06 [1.02-1.09]	0.00071
rs6440820	3	152339320	C	T	1.06 [1.02-1.09]	0.00067
rs11707682	3	152339856	C	G	1.07 [1.03-1.12]	0.00048
rs10935895	3	152341095	A	G	1.07 [1.03-1.12]	0.00049
rs1540782	3	152342045	T	C	1.05 [1.03-1.08]	5.3e-05
rs7646639	3	152350439	T	A	1.05 [1.03-1.08]	5.6e-05
rs9289868	3	152352602	G	T	1.05 [1.02-1.07]	0.00011
rs6784979	3	152353900	C	A	1.05 [1.02-1.07]	0.00022
rs1517241	3	152355245	A	G	1.07 [1.03-1.11]	0.00059
rs1400609	3	152357741	T	G	1.05 [1.03-1.08]	5.9e-05
rs1356363	3	152358911	A	C	1.05 [1.02-1.08]	0.00058
rs9834087	3	152363846	T	C	1.04 [1.02-1.07]	0.00051
rs4679993	3	152368327	A	T	1.05 [1.02-1.08]	0.00026
rs6807032	3	152370974	G	A	1.06 [1.03-1.09]	0.00015
rs4679996	3	152372794	G	A	1.06 [1.03-1.09]	0.00012
rs1878432	3	152374950	T	A	1.06 [1.03-1.09]	0.00022
rs1983338	3	152375596	A	C	1.06 [1.03-1.09]	0.00012
rs7624935	3	152376891	C	T	1.06 [1.03-1.09]	0.00011
rs6806560	3	152378025	A	G	1.06 [1.03-1.09]	0.00011
rs2090443	3	152378630	T	C	1.06 [1.03-1.09]	0.00011
rs6764656	3	152379686	A	G	1.06 [1.03-1.09]	0.00011
rs1517240	3	152382636	A	G	1.06 [1.03-1.09]	9.6e-05
rs9873341	3	152387723	T	C	1.06 [1.03-1.09]	8.6e-05
rs9828639	3	152392877	T	G	1.05 [1.02-1.07]	0.0007
rs1949384	3	152400955	T	C	1.04 [1.02-1.07]	0.0014
rs1949386	3	152402737	A	G	1.07 [1.03-1.11]	0.00017
rs1949385	3	152403025	C	G	1.06 [1.02-1.1]	0.0011
rs11712631	3	152420162	T	G	1.07 [1.03-1.1]	0.00023
rs9848115	3	152421591	C	T	1.05 [1.03-1.08]	0.00018
rs13065792	3	152422298	C	A	1.07 [1.03-1.1]	0.00021
rs1870720	3	152423817	G	A	1.05 [1.02-1.08]	0.0002
rs6762709	3	152424714	A	G	1.05 [1.03-1.08]	0.00018
rs17383287	3	152425558	C	G	1.06 [1.03-1.1]	0.00043
rs17442668	3	152426050	T	C	1.07 [1.03-1.1]	0.00017
rs9877505	3	152432042	C	T	1.05 [1.02-1.08]	0.00055
rs12054173	3	152434714	T	A	1.07 [1.03-1.1]	0.00019
rs13061814	3	152439040	A	G	1.07 [1.03-1.1]	0.00011
rs9289869	3	152441612	C	T	1.04 [1.02-1.07]	0.0013
rs12495424	3	152451732	C	T	1.07 [1.04-1.11]	0.00013
rs12488256	3	152454727	G	A	1.07 [1.03-1.11]	0.00015
rs13095565	3	152479912	T	C	1.07 [1.03-1.11]	0.00018
rs12491993	3	152481845	T	C	1.07 [1.03-1.11]	0.0002
rs12163601	3	152488117	T	C	1.06 [1.03-1.1]	0.00068
rs1978867	3	152507023	T	C	1.05 [1.02-1.09]	0.00039
rs9812406	3	159413737	T	C	1.05 [1.02-1.08]	0.0011
rs12637368	3	162648911	G	A	1.07 [1.03-1.12]	0.0011
rs12635344	3	162785776	G	T	1.1 [1.04-1.15]	0.00033
rs13090583	3	162789598	T	C	1.05 [1.02-1.09]	0.00059
rs12639206	3	162794518	A	C	1.1 [1.04-1.16]	0.00032
rs12639249	3	162794685	T	C	1.18 [1.07-1.29]	0.00053
rs10936334	3	162833021	G	A	1.07 [1.03-1.12]	0.00042
rs6809992	3	162935109	A	G	1.05 [1.02-1.08]	0.00093
rs1427101	3	163111514	C	G	1.06 [1.02-1.09]	0.0013
rs12054004	3	163723844	G	A	1.48 [1.18-1.86]	0.00084
rs9825231	3	166867348	T	A	1.08 [1.03-1.13]	0.00071
rs9814137	3	166872285	T	C	1.06 [1.02-1.1]	0.00076
rs10936546	3	167666284	G	A	1.05 [1.02-1.09]	0.0012
rs12630415	3	168612374	A	G	1.05 [1.02-1.08]	0.0005
rs9871556	3	168671733	C	T	1.05 [1.02-1.07]	0.00065
rs10513654	3	168746668	T	C	1.05 [1.02-1.08]	0.00018
rs974943	3	168746927	G	A	1.04 [1.02-1.07]	0.0009
rs12493032	3	168747765	G	C	1.05 [1.03-1.08]	0.00012
rs9883125	3	168748911	A	T	1.04 [1.02-1.07]	0.00077
rs3851376	3	168757650	T	G	1.06 [1.03-1.09]	9.7e-05
rs4955630	3	168763984	A	G	1.06 [1.03-1.08]	8.3e-05
rs11719778	3	168769568	A	G	1.06 [1.03-1.09]	3.5e-05
rs1420472	3	168776326	T	G	1.06 [1.03-1.09]	2.2e-05
rs1420473	3	168782038	A	T	1.05 [1.02-1.08]	0.00042
rs6793491	3	168786816	C	A	1.05 [1.02-1.08]	0.00059
rs1479404	3	168788692	C	T	1.05 [1.02-1.08]	0.00054
rs6806825	3	168789705	T	C	1.04 [1.02-1.07]	0.0013
rs9823691	3	168790926	G	C	1.05 [1.02-1.08]	0.00026
rs4955634	3	168797063	C	A	1.05 [1.02-1.07]	0.00057
rs10513659	3	168809316	G	A	1.04 [1.02-1.07]	0.0014
rs13094430	3	168814909	T	C	1.05 [1.02-1.08]	0.0011
rs12633440	3	168815209	T	C	1.05 [1.02-1.08]	0.00051
rs1362521	3	168822441	G	A	1.05 [1.02-1.08]	0.0014
rs3851377	3	168837736	C	T	1.05 [1.02-1.08]	0.0003
rs2293661	3	168838408	G	A	1.05 [1.02-1.08]	0.00044
rs9838004	3	168839837	C	G	1.05 [1.02-1.07]	0.001
rs9809990	3	168871394	G	A	1.05 [1.02-1.07]	0.0009
rs7652391	3	168913273	T	G	1.08 [1.03-1.13]	0.00072
rs13080264	3	168920073	C	T	1.05 [1.02-1.07]	0.00096
rs13076441	3	168967323	T	C	1.07 [1.03-1.12]	0.00046
rs12633242	3	168975395	A	G	1.07 [1.03-1.11]	0.00052
rs7644261	3	170676134	C	G	1.06 [1.03-1.09]	9e-05
rs1905505	3	170695426	G	A	1.05 [1.02-1.08]	0.0014
rs1514895	3	170705693	A	G	1.05 [1.02-1.08]	0.0012
rs1604038	3	170709193	C	T	1.05 [1.02-1.08]	0.0011
rs8192675	3	170724883	T	C	1.05 [1.02-1.08]	0.00064
rs9828378	3	170744072	C	G	1.06 [1.03-1.1]	0.00045
rs12106765	3	177580346	T	C	1.05 [1.02-1.07]	0.001
rs13076136	3	177582023	G	A	1.04 [1.02-1.07]	0.00076
rs2196358	3	177585211	T	C	1.04 [1.02-1.07]	0.00075
rs2287208	3	179162316	C	A	1.04 [1.02-1.07]	0.0013
rs1344538	3	179163520	G	A	1.11 [1.04-1.18]	0.00088
rs7614829	3	181178777	A	G	1.11 [1.04-1.18]	0.001
rs1520101	3	183211906	A	G	1.04 [1.02-1.07]	0.00093
rs7623174	3	183234142	G	A	1.04 [1.02-1.07]	0.00077
rs10804891	3	183234383	G	T	1.05 [1.02-1.07]	0.00071
rs7639440	3	183253444	C	T	1.04 [1.02-1.07]	0.0013
rs16858031	3	183441979	A	G	1.12 [1.04-1.2]	0.0014
rs16858096	3	183496011	C	A	1.12 [1.05-1.2]	0.0011
rs2304753	3	183515682	G	A	1.12 [1.05-1.2]	0.0012
rs2289450	3	183520870	G	A	1.13 [1.05-1.21]	0.00086
rs2242122	3	183525288	G	A	1.13 [1.05-1.21]	0.00091
rs2290571	3	183525684	T	A	1.13 [1.05-1.21]	0.00094
rs2304751	3	183526860	G	A	1.13 [1.05-1.21]	0.00086
rs2290567	3	183536132	C	A	1.18 [1.09-1.27]	4.6e-05
rs843336	3	183912339	G	A	1.04 [1.02-1.07]	0.00047
rs2668189	3	183972050	T	G	1.13 [1.05-1.22]	0.0014
rs16860130	3	185292008	T	G	1.08 [1.03-1.13]	0.00038
rs11919895	3	185292039	C	T	1.06 [1.02-1.09]	0.00088
rs17289918	3	185300589	C	T	1.06 [1.03-1.1]	0.00044
rs4686683	3	185307363	G	T	1.05 [1.02-1.07]	0.00073
rs6795633	3	185315745	A	G	1.06 [1.03-1.1]	0.00025
rs6762208	3	185331165	A	C	1.04 [1.02-1.07]	0.00059
rs1823238	3	185341970	A	G	1.08 [1.04-1.12]	0.00021
rs3087964	3	185348402	T	C	1.09 [1.04-1.14]	7.3e-05
rs1816959	3	185351651	G	A	1.05 [1.02-1.08]	0.0008
rs9863780	3	185357300	T	C	1.07 [1.04-1.11]	8.5e-05
rs13327041	3	185360097	T	C	1.07 [1.03-1.1]	0.0002
rs6777038	3	185440960	T	C	1.06 [1.02-1.1]	0.00075
rs1447890	3	185444561	C	G	1.04 [1.02-1.07]	0.00073
rs2290066	3	185445842	C	T	1.05 [1.02-1.08]	0.00038
rs6784185	3	185473065	A	G	1.09 [1.06-1.12]	4.2e-09
rs6784050	3	185473132	T	C	1.09 [1.06-1.12]	6.6e-09
rs6799330	3	185478957	G	T	1.09 [1.06-1.12]	2.3e-09
rs6789741	3	185479733	T	G	1.09 [1.06-1.12]	8.3e-09
rs10513800	3	185480388	A	C	1.09 [1.06-1.13]	3.8e-09
rs16860216	3	185488882	A	G	1.1 [1.07-1.14]	1.4e-09
rs7648605	3	185490734	G	T	1.1 [1.07-1.13]	4.8e-10
rs11706322	3	185497293	T	C	1.08 [1.05-1.11]	2.9e-08
rs4376068	3	185497635	C	A	1.12 [1.09-1.15]	2.8e-16
rs6801848	3	185499057	G	C	1.13 [1.1-1.16]	7.6e-18
rs4481184	3	185505787	T	C	1.14 [1.11-1.17]	4.5e-22
rs11716491	3	185506003	C	T	1.11 [1.08-1.15]	1e-11
rs11705729	3	185507299	T	A	1.14 [1.11-1.17]	2e-21
rs6765808	3	185508029	T	C	1.13 [1.06-1.2]	0.00022
rs7619232	3	185510018	T	C	1.13 [1.07-1.19]	6.3e-06
rs11929397	3	185510190	C	T	1.14 [1.11-1.17]	3.6e-21
rs7633675	3	185510613	G	T	1.14 [1.11-1.17]	1.3e-21
rs16860234	3	185510884	C	A	1.11 [1.08-1.14]	1.5e-14
rs4402960	3	185511687	T	G	1.12 [1.09-1.14]	9.4e-18
rs16860235	3	185512361	A	G	1.13 [1.09-1.17]	2.7e-11
rs7640539	3	185513296	A	T	1.14 [1.11-1.17]	3.1e-21
rs4686694	3	185514008	C	G	1.12 [1.07-1.18]	3.2e-06
rs6444081	3	185514393	C	T	1.14 [1.11-1.17]	1.9e-21
rs7646518	3	185514931	C	T	1.14 [1.11-1.17]	2.8e-21
rs7637773	3	185515635	A	G	1.14 [1.11-1.17]	3.5e-21
rs4686696	3	185516520	A	G	1.14 [1.11-1.17]	2.6e-21
rs6767484	3	185520578	G	A	1.14 [1.11-1.17]	2.8e-21
rs6767577	3	185520732	C	A	1.1 [1.07-1.13]	3.5e-11
rs7640744	3	185522447	A	G	1.11 [1.08-1.14]	2.3e-14
rs13060777	3	185525199	G	A	1.1 [1.07-1.13]	8.3e-11
rs11711477	3	185526690	A	T	1.12 [1.09-1.14]	1.6e-17
rs1470579	3	185529080	C	A	1.13 [1.1-1.16]	5.4e-22
rs1470580	3	185529174	A	T	1.14 [1.1-1.19]	6.8e-11
rs1470581	3	185529327	G	A	1.1 [1.07-1.13]	3.4e-11
rs6769511	3	185530290	C	T	1.13 [1.1-1.16]	5.3e-21
rs9837654	3	185530322	A	G	1.1 [1.07-1.13]	2.8e-11
rs4686698	3	185531697	A	G	1.13 [1.07-1.18]	1.7e-06
rs9859406	3	185534482	A	G	1.14 [1.11-1.17]	2.1e-20
rs6444082	3	185536223	T	G	1.12 [1.08-1.15]	8.3e-13
rs764129	3	185547917	T	C	1.08 [1.06-1.11]	5.7e-10
rs720390	3	185548683	A	G	1.06 [1.03-1.09]	0.00016
rs2377868	3	186237034	C	T	1.06 [1.03-1.1]	0.00033
rs1468906	3	186648117	A	G	1.11 [1.05-1.16]	5.2e-05
rs3864106	3	186656602	G	C	1.06 [1.04-1.09]	3.9e-06
rs11719915	3	186657705	A	G	1.12 [1.05-1.19]	0.00024
rs16861317	3	186664728	G	A	1.09 [1.05-1.13]	1.4e-05
rs3852060	3	186665539	C	G	1.09 [1.05-1.14]	8.8e-06
rs3887925	3	186665645	T	C	1.08 [1.05-1.11]	4.1e-08
rs16861329	3	186666461	C	T	1.09 [1.05-1.13]	8.5e-06
rs6764216	3	188907095	A	G	1.04 [1.02-1.07]	0.0012
rs4687029	3	188908382	A	G	1.04 [1.02-1.07]	0.0011
rs6809074	3	190241762	C	T	1.17 [1.06-1.29]	0.0012
rs709087	3	191456299	C	T	1.05 [1.02-1.08]	0.0012
rs779512	3	191456334	T	C	1.05 [1.02-1.08]	0.00037
rs1250107	4	1229938	C	A	1.08 [1.03-1.14]	0.0012
rs11247980	4	1274734	A	G	1.07 [1.04-1.11]	6.6e-05
rs1344301	4	1288031	T	C	1.08 [1.04-1.12]	6.2e-05
rs6819243	4	1293245	T	C	1.08 [1.04-1.12]	8.2e-05
rs6837701	4	1293302	C	T	1.07 [1.03-1.11]	0.00029
rs4974595	4	1301001	C	T	1.08 [1.04-1.12]	0.0001
rs17164620	4	1304161	A	G	1.07 [1.04-1.11]	0.00013
rs17164623	4	1304277	G	A	1.06 [1.02-1.1]	0.0013
rs7672093	4	1304743	C	A	1.07 [1.03-1.11]	0.00096
rs6599299	4	1305018	T	C	1.08 [1.04-1.12]	7.5e-05
rs17164638	4	1306595	C	G	1.08 [1.04-1.12]	7.7e-05
rs11247989	4	1308337	A	G	1.07 [1.03-1.11]	0.00078
rs11247990	4	1308536	G	C	1.08 [1.04-1.12]	4.8e-05
rs11247991	4	1308564	A	G	1.07 [1.03-1.11]	0.00063
rs6815464	4	1309901	C	G	1.1 [1.04-1.16]	0.00044
rs4333131	4	1323789	A	G	1.06 [1.03-1.09]	0.0003
rs3856982	4	1328863	T	C	1.06 [1.03-1.09]	0.00016
rs10006789	4	1330333	T	C	1.05 [1.02-1.08]	0.0012
rs3749456	4	1344228	C	G	1.08 [1.04-1.12]	2.1e-05
rs17164682	4	1346796	A	G	1.06 [1.02-1.1]	0.0013
rs2276904	4	1349029	G	A	1.08 [1.04-1.13]	0.00027
rs1882099	4	1352685	A	G	1.05 [1.02-1.08]	0.00096
rs2247341	4	1701317	G	A	1.05 [1.02-1.07]	0.00046
rs2854917	4	1720550	T	C	1.05 [1.02-1.07]	0.00095
rs743694	4	2811841	T	C	1.19 [1.09-1.3]	0.00015
rs12510489	4	3282774	A	T	1.06 [1.03-1.1]	0.0004
rs12508004	4	3282848	T	C	1.06 [1.02-1.09]	0.00098
rs12500459	4	3284340	A	G	1.07 [1.03-1.11]	0.00037
rs12506821	4	3284560	C	T	1.06 [1.03-1.1]	0.00036
rs4688982	4	6267001	T	C	1.08 [1.05-1.12]	2.9e-07
rs4689388	4	6270056	A	G	1.09 [1.06-1.12]	1.7e-08
rs4320200	4	6271043	T	A	1.09 [1.06-1.12]	3.3e-08
rs10002743	4	6276581	A	G	1.07 [1.03-1.11]	0.00012
rs6824720	4	6278647	G	A	1.08 [1.04-1.12]	0.0001
rs10937714	4	6279047	T	C	1.07 [1.03-1.1]	0.00015
rs4689391	4	6280449	A	G	1.08 [1.05-1.11]	3.9e-07
rs752854	4	6281961	T	C	1.1 [1.06-1.14]	1.4e-07
rs3889821	4	6282596	T	C	1.08 [1.05-1.11]	1.1e-07
rs4688986	4	6285797	A	C	1.08 [1.05-1.11]	5.5e-08
rs4689393	4	6287241	C	T	1.08 [1.05-1.11]	4e-07
rs4688987	4	6287329	T	C	1.09 [1.06-1.12]	2.8e-08
rs12508672	4	6287965	A	G	1.09 [1.06-1.12]	3.5e-09
rs4689394	4	6291003	G	C	1.09 [1.06-1.12]	2e-09
rs4293850	4	6292020	C	A	1.09 [1.06-1.12]	2.4e-09
rs5018647	4	6292799	C	A	1.09 [1.06-1.12]	5e-09
rs5018648	4	6292818	G	C	1.09 [1.06-1.12]	3.2e-09
rs10012946	4	6293350	C	T	1.09 [1.06-1.12]	2e-09
rs13101355	4	6293446	C	T	1.09 [1.06-1.12]	1.2e-08
rs4416547	4	6293967	A	G	1.09 [1.06-1.12]	4e-09
rs4308429	4	6294001	G	A	1.09 [1.06-1.12]	3.4e-09
rs4467645	4	6294305	T	C	1.09 [1.06-1.12]	3.2e-09
rs13128674	4	6294517	T	C	1.09 [1.06-1.12]	2.9e-09
rs13103357	4	6294544	G	A	1.1 [1.07-1.13]	5.1e-10
rs10026334	4	6294607	A	G	1.1 [1.06-1.15]	8.1e-07
rs13108780	4	6294630	G	A	1.09 [1.06-1.13]	1.3e-09
rs12649341	4	6294759	A	G	1.09 [1.06-1.12]	3.4e-09
rs10937717	4	6295087	A	T	1.09 [1.06-1.12]	5.6e-09
rs10937718	4	6295217	C	T	1.09 [1.06-1.12]	3.4e-09
rs10937719	4	6295322	G	C	1.1 [1.06-1.13]	4.1e-09
rs10937720	4	6295451	G	A	1.09 [1.06-1.12]	2.4e-09
rs6446482	4	6295693	G	C	1.1 [1.06-1.13]	9.9e-10
rs13130845	4	6297646	C	A	1.09 [1.06-1.12]	2.6e-09
rs4689397	4	6299387	A	G	1.08 [1.05-1.11]	5.7e-08
rs3821943	4	6299940	T	C	1.08 [1.05-1.11]	2.1e-07
rs734312	4	6303354	A	G	1.07 [1.05-1.1]	2.6e-07
rs7663016	4	8705387	C	T	1.06 [1.03-1.1]	0.0006
rs7682634	4	8706264	T	G	1.06 [1.02-1.09]	0.0013
rs7438203	4	8707027	A	T	1.06 [1.03-1.1]	0.00061
rs13107883	4	11863918	G	A	1.05 [1.02-1.08]	0.0014
rs17322411	4	11870144	T	C	1.05 [1.02-1.09]	0.00086
rs1993639	4	18071365	C	T	1.05 [1.02-1.08]	0.0013
rs1563749	4	18072500	C	T	1.05 [1.02-1.08]	0.00032
rs4698667	4	18073943	T	C	1.05 [1.02-1.09]	0.00071
rs924789	4	18085694	C	T	1.05 [1.02-1.09]	0.00054
rs10014368	4	18090536	C	A	1.06 [1.03-1.09]	0.0004
rs6858560	4	18094853	C	T	1.05 [1.02-1.08]	0.0013
rs4698214	4	18098585	A	G	1.05 [1.02-1.08]	0.00091
rs10004929	4	18111823	C	T	1.05 [1.02-1.08]	0.00033
rs4698216	4	18129723	C	T	1.05 [1.02-1.08]	0.00074
rs10938814	4	20856297	C	G	1.12 [1.06-1.19]	0.00014
rs16870863	4	21339971	C	T	1.1 [1.04-1.17]	0.0013
rs10516382	4	21341912	A	G	1.11 [1.04-1.18]	0.00076
rs16870875	4	21343377	G	T	1.1 [1.04-1.17]	0.0013
rs16870886	4	21348112	C	T	1.1 [1.04-1.17]	0.0013
rs16870888	4	21348467	A	T	1.1 [1.04-1.17]	0.0012
rs1872457	4	21349403	C	T	1.11 [1.04-1.17]	0.0011
rs16870895	4	21349874	T	G	1.1 [1.04-1.17]	0.0013
rs13141449	4	21352111	G	T	1.11 [1.04-1.18]	0.00095
rs13141872	4	21352315	G	A	1.11 [1.04-1.17]	0.0011
rs7698713	4	21354901	T	C	1.11 [1.04-1.17]	0.001
rs16870934	4	21364520	G	C	1.11 [1.04-1.18]	0.001
rs418932	4	22834211	C	T	1.16 [1.07-1.25]	0.0002
rs403543	4	22844392	A	G	1.13 [1.06-1.21]	0.00033
rs358223	4	22849299	G	A	1.16 [1.07-1.25]	0.0004
rs358221	4	22850299	G	A	1.13 [1.06-1.21]	0.00023
rs358218	4	22853937	T	C	1.28 [1.11-1.48]	0.00075
rs7685185	4	24276706	G	A	1.06 [1.03-1.1]	0.00044
rs11725410	4	26501372	A	G	1.04 [1.02-1.07]	0.0014
rs2037549	4	32017834	T	C	1.08 [1.04-1.13]	0.00018
rs13118218	4	32067265	T	C	1.08 [1.04-1.12]	0.00016
rs13148135	4	32086519	G	A	1.09 [1.05-1.14]	4.1e-05
rs13131870	4	32111446	C	T	1.08 [1.03-1.12]	0.0003
rs7682698	4	32116475	T	C	1.08 [1.04-1.13]	0.00015
rs13103984	4	32117746	G	C	1.08 [1.04-1.13]	0.00016
rs13141313	4	32117779	T	A	1.08 [1.04-1.13]	0.0002
rs13102723	4	32118479	A	G	1.08 [1.04-1.12]	0.00024
rs6827797	4	32145808	G	A	1.08 [1.03-1.12]	0.00071
rs902655	4	32148210	A	G	1.08 [1.03-1.12]	0.00054
rs10003644	4	32149433	G	T	1.07 [1.03-1.11]	0.00069
rs10003017	4	32151694	G	C	1.08 [1.03-1.12]	0.00068
rs4467623	4	32154161	G	A	1.07 [1.03-1.12]	0.00082
rs7661608	4	32154340	G	A	1.05 [1.02-1.08]	0.0012
rs1386621	4	38418977	T	C	1.06 [1.02-1.09]	0.0011
rs1960270	4	41267321	T	C	1.14 [1.06-1.21]	0.00015
rs1984713	4	47956556	A	G	1.04 [1.02-1.07]	0.00099
rs2289065	4	48894981	G	A	1.05 [1.02-1.07]	0.00092
rs4865290	4	53278689	G	A	1.05 [1.02-1.08]	0.00092
rs931734	4	53296310	G	A	1.05 [1.02-1.08]	0.00069
rs238312	4	53382829	T	C	1.04 [1.02-1.07]	0.00099
rs7666719	4	58540084	C	T	1.05 [1.02-1.08]	0.00065
rs9995647	4	60099737	C	T	1.55 [1.19-2]	0.00093
rs10021361	4	60141899	A	G	1.55 [1.19-2]	0.00093
rs2197920	4	61989504	T	C	1.11 [1.04-1.18]	0.0013
rs1349234	4	61990350	G	A	1.11 [1.04-1.18]	0.0013
rs1156632	4	61991516	A	G	1.13 [1.05-1.21]	0.0011
rs17238862	4	62069200	T	C	1.25 [1.1-1.44]	0.0011
rs1455225	4	63414908	T	C	1.13 [1.05-1.21]	0.0013
rs2345934	4	63439015	G	T	1.13 [1.05-1.22]	0.0011
rs13106419	4	63441218	C	A	1.14 [1.06-1.23]	0.0003
rs13144513	4	63443282	T	G	1.13 [1.05-1.22]	0.0013
rs2881255	4	63446998	T	C	1.15 [1.07-1.24]	0.0002
rs13148528	4	65767392	T	C	1.09 [1.04-1.15]	0.00067
rs6858826	4	72923838	G	A	1.15 [1.06-1.24]	0.0009
rs1434550	4	73273372	A	G	1.05 [1.02-1.08]	0.00045
rs13112404	4	73273605	T	C	1.05 [1.02-1.07]	0.0005
rs1434552	4	73275483	T	G	1.05 [1.02-1.08]	0.00096
rs1434553	4	73275557	T	C	1.05 [1.02-1.08]	0.00095
rs976725	4	73279669	C	T	1.05 [1.02-1.08]	0.00071
rs1481664	4	73282419	C	T	1.05 [1.02-1.08]	0.00075
rs6833687	4	73283282	A	T	1.05 [1.02-1.08]	0.0006
rs2366036	4	73287000	G	T	1.05 [1.02-1.08]	0.0011
rs2200042	4	73290623	C	T	1.05 [1.02-1.08]	0.00049
rs12644571	4	73293658	T	G	1.05 [1.02-1.08]	0.00098
rs4379033	4	73296221	A	T	1.05 [1.02-1.08]	0.00099
rs7700235	4	73303085	T	A	1.05 [1.02-1.08]	0.00048
rs1481669	4	73303186	G	A	1.05 [1.02-1.08]	0.00044
rs1383938	4	73305740	T	C	1.07 [1.03-1.12]	0.00059
rs7697221	4	73306674	T	C	1.05 [1.02-1.08]	0.00096
rs13136232	4	73307045	T	C	1.05 [1.02-1.08]	0.00093
rs7657394	4	73307597	T	C	1.04 [1.02-1.07]	0.00094
rs7692126	4	73308274	C	T	1.05 [1.02-1.08]	0.00039
rs7683738	4	73311640	T	C	1.05 [1.02-1.08]	0.0007
rs1531740	4	73312109	A	C	1.05 [1.02-1.08]	0.00045
rs13116502	4	73314056	T	C	1.05 [1.02-1.08]	0.00048
rs1383941	4	73318935	A	C	1.04 [1.02-1.07]	0.0013
rs16847972	4	73319971	T	A	1.05 [1.02-1.08]	0.0009
rs1383929	4	73327510	C	T	1.05 [1.02-1.08]	0.00039
rs10024063	4	73328204	A	G	1.05 [1.02-1.08]	0.00049
rs2046192	4	73332922	G	A	1.05 [1.02-1.08]	0.00043
rs1383932	4	73334419	A	C	1.05 [1.02-1.08]	0.00023
rs7436538	4	73334670	C	T	1.05 [1.02-1.08]	0.00049
rs12503973	4	73335031	T	C	1.05 [1.02-1.08]	0.00035
rs6823875	4	73335098	A	C	1.04 [1.02-1.07]	0.0012
rs13149089	4	73336507	G	C	1.05 [1.02-1.08]	0.00032
rs13102917	4	73337399	G	A	1.05 [1.02-1.08]	0.00063
rs13104517	4	73337442	C	T	1.05 [1.02-1.08]	0.00055
rs6843756	4	73337545	T	C	1.05 [1.02-1.08]	0.00064
rs6812435	4	73337642	G	C	1.05 [1.02-1.08]	0.00064
rs2128069	4	73339178	T	C	1.05 [1.02-1.07]	0.00087
rs12651548	4	73339613	T	C	1.05 [1.02-1.08]	0.00062
rs1841935	4	76500389	G	C	1.05 [1.02-1.09]	0.00081
rs7684530	4	76502146	C	G	1.05 [1.02-1.08]	0.00092
rs1871114	4	76502748	T	C	1.05 [1.02-1.08]	0.00082
rs9684107	4	76508953	C	T	1.05 [1.02-1.09]	0.00074
rs13134611	4	76509972	C	T	1.05 [1.02-1.08]	0.0013
rs2009832	4	76513660	C	T	1.05 [1.02-1.08]	0.00079
rs6830063	4	76529817	C	T	1.05 [1.02-1.08]	0.00039
rs6847167	4	76529902	C	G	1.05 [1.02-1.08]	0.00081
rs1553985	4	76554604	G	A	1.06 [1.03-1.09]	0.00027
rs17000733	4	76580894	A	G	1.05 [1.02-1.08]	0.001
rs17000740	4	76590608	A	G	1.05 [1.02-1.09]	0.00081
rs11935974	4	83573730	G	A	1.08 [1.03-1.13]	0.00083
rs2174632	4	83586477	T	A	1.05 [1.02-1.08]	0.0014
rs17006135	4	83616978	C	T	1.09 [1.04-1.15]	0.00092
rs6535419	4	83890975	A	G	1.07 [1.03-1.11]	0.00067
rs2868708	4	83903895	T	C	1.08 [1.03-1.12]	0.00025
rs13107701	4	86728147	T	C	1.07 [1.03-1.12]	0.0011
rs12500543	4	87318994	T	C	1.19 [1.08-1.32]	0.0004
rs17013609	4	88882095	G	A	1.19 [1.08-1.31]	0.00053
rs356219	4	90637601	A	G	1.05 [1.02-1.07]	0.00071
rs356220	4	90641340	C	T	1.05 [1.02-1.08]	0.00035
rs356165	4	90646886	A	G	1.04 [1.02-1.07]	0.001
rs11944331	4	90690329	C	T	1.09 [1.04-1.15]	0.00089
rs1114290	4	92488806	T	C	1.05 [1.02-1.08]	0.00078
rs13149286	4	92537483	G	A	1.04 [1.02-1.07]	0.00072
rs13117758	4	92543540	A	T	1.04 [1.02-1.07]	0.00064
rs6852718	4	92565263	G	C	1.04 [1.02-1.07]	0.0014
rs13139221	4	92599301	G	T	1.04 [1.02-1.07]	0.0011
rs11945434	4	93940966	C	G	1.13 [1.06-1.21]	0.0004
rs10516918	4	93965855	T	G	1.12 [1.05-1.2]	0.0011
rs1585651	4	95058755	C	T	1.07 [1.03-1.11]	0.00059
rs9996975	4	95101338	C	G	1.05 [1.02-1.09]	0.0014
rs2171384	4	95103545	G	A	1.05 [1.02-1.08]	0.0012
rs6825522	4	95108140	G	T	1.05 [1.02-1.09]	0.0012
rs1006643	4	96760577	G	T	1.07 [1.03-1.12]	0.0013
rs1436535	4	96768774	C	T	1.05 [1.02-1.08]	0.00054
rs4699472	4	96781055	C	T	1.05 [1.02-1.08]	0.001
rs1514974	4	96923483	A	G	1.05 [1.02-1.08]	0.0003
rs1011495	4	96940187	A	G	1.05 [1.02-1.08]	0.00079
rs1514969	4	96941335	G	A	1.05 [1.02-1.07]	0.00089
rs971523	4	96944782	T	A	1.05 [1.02-1.07]	0.0012
rs17031377	4	102431940	A	T	1.08 [1.04-1.12]	0.00025
rs12509403	4	103525350	C	T	1.08 [1.03-1.12]	0.00084
rs223445	4	103714494	T	G	1.08 [1.04-1.12]	0.00013
rs223381	4	103753735	T	G	1.08 [1.04-1.12]	0.00015
rs223317	4	103802824	T	C	1.07 [1.03-1.12]	0.0005
rs223314	4	103805799	A	G	1.08 [1.04-1.12]	9.5e-05
rs6823625	4	103813594	T	C	1.05 [1.02-1.09]	0.00067
rs2866416	4	103880711	G	C	1.07 [1.03-1.12]	0.00045
rs3886722	4	103904241	T	A	1.08 [1.04-1.12]	6.3e-05
rs9999303	4	103908038	G	A	1.06 [1.02-1.09]	0.00075
rs11097796	4	103923558	C	T	1.06 [1.02-1.09]	0.00074
rs4698927	4	105852475	C	T	1.57 [1.19-2.06]	0.0014
rs2726521	4	106189614	T	G	1.37 [1.18-1.58]	3.2e-05
rs2647251	4	106204020	C	A	1.38 [1.19-1.6]	2.6e-05
rs7665836	4	108731771	G	A	1.11 [1.04-1.19]	0.0014
rs998539	4	110708636	G	A	1.26 [1.09-1.44]	0.0012
rs11728821	4	111194525	G	A	1.05 [1.02-1.08]	0.00066
rs1486868	4	113362316	A	G	1.1 [1.05-1.15]	3.3e-05
rs17679264	4	115856995	C	T	1.07 [1.03-1.12]	0.0012
rs4834481	4	116362076	G	C	1.08 [1.03-1.13]	0.0011
rs4834613	4	118313517	T	C	1.21 [1.1-1.34]	6.8e-05
rs17866961	4	118340829	G	T	1.21 [1.09-1.33]	0.00018
rs17869666	4	118341534	C	T	1.19 [1.07-1.32]	0.0013
rs11947585	4	122160986	A	T	1.06 [1.02-1.1]	0.0014
rs11938619	4	122161207	G	A	1.06 [1.02-1.1]	0.0014
rs2706785	4	122660250	G	A	1.17 [1.07-1.28]	0.00074
rs2637592	4	130656378	G	A	1.15 [1.06-1.24]	0.00048
rs17050612	4	130661401	G	A	1.14 [1.05-1.24]	0.0011
rs17446803	4	132041578	C	T	1.22 [1.08-1.37]	0.0012
rs11932598	4	132199142	T	C	1.04 [1.02-1.07]	0.0011
rs10461158	4	134399791	T	C	1.17 [1.07-1.28]	0.00043
rs4129152	4	136013237	T	C	1.08 [1.03-1.12]	0.0013
rs12642647	4	140212927	T	C	1.1 [1.04-1.16]	0.00092
rs9884319	4	148431660	A	T	1.52 [1.2-1.93]	0.00052
rs9308221	4	148434842	T	C	1.53 [1.2-1.94]	0.00048
rs1517135	4	148437554	T	C	1.51 [1.18-1.94]	0.00098
rs893023	4	148752359	A	G	1.13 [1.05-1.21]	0.001
rs10033601	4	153252061	A	G	1.08 [1.05-1.1]	6.5e-08
rs17028828	4	153268943	C	G	1.08 [1.04-1.12]	0.00023
rs11931711	4	153291513	C	T	1.07 [1.05-1.1]	1.1e-07
rs6535848	4	153299873	T	C	1.08 [1.04-1.12]	0.0001
rs7673175	4	153301216	T	C	1.07 [1.04-1.1]	2.6e-07
rs1516822	4	153330301	T	C	1.06 [1.04-1.09]	1.7e-06
rs12644477	4	153332380	T	G	1.08 [1.04-1.13]	5.5e-05
rs4696321	4	153342645	T	C	1.07 [1.04-1.1]	1.2e-06
rs964475	4	153352795	C	T	1.06 [1.03-1.09]	1.9e-05
rs2406375	4	153367257	T	C	1.07 [1.04-1.09]	1.6e-06
rs10031972	4	153371764	A	G	1.06 [1.03-1.09]	4.8e-06
rs2628570	4	153373680	G	T	1.06 [1.03-1.09]	5e-06
rs1516820	4	153380801	T	C	1.06 [1.03-1.09]	8.1e-06
rs1356300	4	153385469	A	C	1.06 [1.04-1.09]	2.2e-06
rs7660590	4	153397823	C	T	1.07 [1.04-1.1]	1.1e-06
rs10021011	4	153410390	C	A	1.07 [1.04-1.1]	1.3e-06
rs9991574	4	153411843	T	C	1.06 [1.04-1.09]	1.5e-06
rs718089	4	153412394	A	G	1.06 [1.03-1.09]	9.7e-06
rs17028932	4	153415654	T	C	1.06 [1.03-1.09]	7.5e-06
rs6535851	4	153425449	C	T	1.06 [1.03-1.09]	1e-05
rs1516819	4	153433451	A	C	1.06 [1.04-1.09]	2.3e-06
rs17028954	4	153438333	C	G	1.06 [1.04-1.09]	2.2e-06
rs6816962	4	153450360	G	T	1.07 [1.04-1.1]	1.7e-07
rs1023962	4	153451356	T	G	1.06 [1.03-1.09]	6.3e-06
rs1484879	4	153455628	A	G	1.06 [1.03-1.09]	8.5e-06
rs10005169	4	153463755	G	A	1.08 [1.03-1.12]	0.00065
rs6832998	4	153470666	A	T	1.07 [1.04-1.09]	1.6e-06
rs1545904	4	153496173	A	C	1.06 [1.03-1.09]	6.1e-06
rs2054759	4	153499990	A	G	1.06 [1.03-1.09]	9.4e-06
rs6536202	4	157621983	T	A	1.05 [1.02-1.08]	0.00028
rs971337	4	157662803	T	C	1.05 [1.02-1.08]	0.00082
rs10023148	4	157722648	A	G	1.08 [1.03-1.12]	0.00046
rs4690875	4	157994894	T	C	1.13 [1.06-1.21]	0.00028
rs17039720	4	161468070	A	C	1.12 [1.05-1.2]	0.00068
rs10517743	4	162308134	C	G	1.09 [1.03-1.14]	0.0012
rs7672612	4	166149834	G	A	2.91 [1.62-5.22]	0.00036
rs12511498	4	168653597	G	C	1.05 [1.02-1.08]	0.00056
rs4146433	4	177400257	T	C	1.06 [1.02-1.09]	0.0011
rs6839923	4	178431520	G	C	1.06 [1.03-1.09]	0.00023
rs12510932	4	178454290	C	A	1.06 [1.02-1.09]	0.00046
rs9992297	4	180392930	T	G	1.05 [1.02-1.08]	0.00046
rs6817502	4	180393165	C	G	1.05 [1.02-1.08]	0.00044
rs10031730	4	180395158	C	G	1.05 [1.02-1.07]	0.00046
rs2546614	4	181426359	G	A	1.06 [1.03-1.09]	6.9e-05
rs2727413	4	181429878	A	G	1.06 [1.03-1.09]	0.00019
rs6846186	4	181493567	C	G	1.08 [1.04-1.13]	0.00035
rs6834019	4	183817659	C	A	1.17 [1.06-1.28]	0.0011
rs735949	4	185716232	T	C	1.09 [1.04-1.15]	0.00093
rs4863137	4	190261566	G	A	1.86 [1.27-2.73]	0.0013
rs13139559	4	190818724	C	G	1.19 [1.07-1.33]	0.0011
rs6818333	4	190824795	G	A	1.17 [1.07-1.29]	0.00084
rs2411529	4	190862142	C	T	1.18 [1.07-1.3]	0.0011
rs1709544	5	674921	T	C	1.05 [1.02-1.08]	0.00088
rs392088	5	677718	A	G	1.06 [1.02-1.09]	0.00037
rs446181	5	681008	A	T	1.06 [1.03-1.09]	0.00025
rs898060	5	2330992	T	C	1.04 [1.02-1.07]	0.0013
rs10052033	5	9826527	T	C	1.13 [1.06-1.21]	0.00036
rs16883614	5	9833765	G	C	1.1 [1.04-1.16]	0.0011
[truncated: 4,839 more rows]

## Sheet: Supl File 1b
		START		BiB		Meta-analysis
Dependent Variables	Independent Variables	Beta / OR [95%CI] a	P-value	Beta / OR [95%CI] a	P-value	Beta / OR [95%CI] a	P-value	I2	QE P-value
Fasting glucose	PRS (per 1SD increase)	0.097 [0.058 - 0.135]	1.20 × 10-06	0.087 [0.068 - 0.105]	1.51 × 10-20	0.088 [0.072 - 0.105]	5.94 × 10-26	0	0.65
	PRS (T1 vs. T2)	0.141 [0.046 - 0.236]	0.004	0.078 [0.033 - 0.122]	7.00 × 10-04	0.089 [0.049 - 0.129]	2.00 × 10-05	29	0.24
	PRS (T1 vs. T3)	0.234 [0.139 - 0.329]	1.60 × 10-06	0.192 [0.147 - 0.236]	5.07 × 10-17	0.199 [0.159 - 0.24]	3.78 × 10-22	0	0.43
2h postload glucose	PRS (per 1SD increase)	0.248 [0.128 - 0.369]	6.00 × 10-05	0.228 [0.178 - 0.278]	3.66 × 10-19	0.231 [0.185 - 0.277]	6.42 × 10-23	0	0.76
	PRS (T1 vs. T2)	0.58 [0.283 - 0.876]	1.00 × 10-04	0.159 [0.037 - 0.281]	0.01	0.22 [0.107 - 0.333]	1.00 × 10-04	85	0.01
	PRS (T1 vs. T3)	0.508 [0.212 - 0.804]	8.00 × 10-04	0.472 [0.35 - 0.594]	4.58 × 10-14	0.477 [0.364 - 0.59]	1.22 × 10-16	0	0.82
AUC glucose	PRS (per 1SD increase)	0.206 [0.139 - 0.273]	2.10 × 10-09	0.163 [0.132 - 0.193]	1.16 × 10-24	0.17 [0.142 - 0.198]	1.06 × 10-32	25	0.25
	PRS (T1 vs. T2)	0.323 [0.158 - 0.488]	1.00 × 10-04	0.132 [0.056 - 0.207]	7.00 × 10-04	0.165 [0.096 - 0.234]	2.55 × 10-06	77	0.04
	PRS (T1 vs. T3)	0.456 [0.292 - 0.621]	7.03 × 10-08	0.342 [0.266 - 0.418]	1.38 × 10-18	0.362 [0.293 - 0.431]	6.49 × 10-25	34	0.22
GDM (IADPSG)	PRS (per 1SD increase)	1.6 [1.35 - 1.9]	7.25 × 10-08	1.43 [1.3 - 1.58]	3.61 × 10-13	1.47 [1.35-1.6]	2.68 × 10-19	16	0.28
	PRS (T1 vs. T2)	2.18 [1.42 - 3.38]	4.00 × 10-04	1.23 [0.95 - 1.59]	0.11	1.43 [1.15-1.78]	0.001	80	0.03
	PRS (T1 vs. T3)	2.88 [1.9 - 4.43]	8.66 × 10-07	2.05 [1.62 - 2.61]	2.68 × 10-09	2.23 [1.81-2.74]	3.02 × 10-14	47	0.17
GDM (South Asian-specific definition)	PRS (per 1SD increase)	1.57 [1.35 - 1.83]	6.72 × 10-09	1.33 [1.23 - 1.43]	6.93 × 10-14	1.37 [1.28-1.46]	1.82 × 10-20	73	0.05
	PRS (T1 vs. T2)	2.09 [1.46 - 3.02]	7.00 × 10-05	1.29 [1.07 - 1.56]	0.007	1.43 [1.21-1.69]	3.00 × 10-05	81	0.02
	PRS (T1 vs. T3)	2.5 [1.74 - 3.6]	7.44 × 10-07	1.86 [1.55 - 2.23]	1.51 × 10-11	1.97 [1.68-2.32]	1.66 × 10-16	51	0.15

## Sheet: Supl File 1c
		START		BiB		Meta-analysis
Dependent Variable	Independent Variables	Beta/OR [95%CI] a	P-value	Beta/OR [95%CI] a	P-value	Beta/OR [95%CI] a	P-value	I2	QE P-value
GDM (South Asian specific definition)	PRS (per 1SD increase)	1.56 [1.33 - 1.84]	1.21 × 10-07	1.34 [1.23 - 1.47]	3.42 × 10-11	1.39 [1.28 - 1.5]	7.81 × 10-17	60	0.12
	Age (year)	1.1 [1.05 - 1.15]	8.00 × 10-05	1.08 [1.06 - 1.1]	1.54 × 10-13	1.08 [1.06 - 1.1]	6.29 × 10-17	0	0.59
	BMI (kg/m2)	1.08 [1.04 - 1.12]	4.00 × 10-05	1.08 [1.07 - 1.1]	5.69 × 10-21	1.08 [1.07 - 1.1]	1.01 × 10-24	0	0.9
	Born in South Asia (Yes/No)	1.31 [0.8 - 2.18]	0.29	1.67 [1.4 - 2.01]	3.21 × 10-08	1.63 [1.37 - 1.93]	2.76 × 10-08	0	0.37
	Parental history of T2D (Yes/No)	1.54 [1.12 - 2.11]	0.008	1.55 [1.29 - 1.87]	3.75 × 10-06	1.55 [1.32 - 1.82]	1.02 × 10-07	0	0.96
	Parity	0.94 [0.76 - 1.17]	0.59	0.92 [0.85 - 0.99]	0.03	0.92 [0.86 - 0.99]	0.03	0	0.83
	Education level (per level)	0.94 [0.81 - 1.09]	0.43	0.94 [0.86 - 1.01]	0.09	0.94 [0.87 - 1]	0.06	0	0.92
	Low diet quality (Yes/No)	1.44 [1.01 - 2.06]	0.04	-	-	-	-	-	-

## Sheet: Supl File 1d
		START		BiB		Meta-analysis
Dependent Variable	Independent Variables	Beta/OR [95%CI] a	P-value	Beta/OR [95%CI] a	P-value	Beta/OR [95%CI] a	P-value	I2	QE P-value
Fasting glucose	PRS T2 (vs. T1)	0.105 [0.008 - 0.201]	0.03	0.067 [0.017 - 0.116]	0.008	0.075 [0.031 - 0.118]	8.00 × 10-04	0	0.49
	PRS T3 (vs. T1)	0.204 [0.106 - 0.302]	5.00 × 10-05	0.19 [0.141 - 0.24]	8.03 × 10-14	0.193 [0.149 - 0.237]	1.30 × 10-17	0	0.8
2h postload glucose	PRS T2 (vs. T1)	0.479 [0.188 - 0.771]	0.001	0.135 [0 - 0.27]	0.05	0.196 [0.074 - 0.318]	0.002	77	0.04
	PRS T3 (vs. T1)	0.381 [0.083 - 0.678]	0.01	0.429 [0.293 - 0.565]	7.33 × 10-10	0.421 [0.297 - 0.544]	2.67 × 10-11	0	0.77
AUC glucose	PRS T2 (vs. T1)	0.266 [0.107 - 0.424]	0.001	0.113 [0.033 - 0.194]	0.006	0.145 [0.073 - 0.217]	8.00 × 10-05	65	0.09
	PRS T3 (vs. T1)	0.375 [0.214 - 0.536]	5.81 × 10-06	0.317 [0.235 - 0.399]	3.46 × 10-14	0.329 [0.256 - 0.402]	8.28 × 10-19	0	0.53
GDM (IADPSG)	PRS T2 (vs. T1)	2.01 [1.27-3.21]	0.003	1.17 [0.87-1.57]	0.31	1.37 [1.06-1.75]	0.01	73	0.05
	PRS T3 (vs. T1)	2.73 [1.74-4.34]	2.00 × 10-05	2.02 [1.53-2.67]	6.41 × 10-07	2.19 [1.73-2.77]	8.59 × 10-11	18	0.27
GDM (South Asian-specific definition)	PRS T2 (vs. T1)	2.01 [1.36-2.99]	5.00 × 10-04	1.25 [1-1.56]	0.05	1.4 [1.15-1.7]	6.00 × 10-04	77	0.04
	PRS T3 (vs. T1)	2.43 [1.64-3.61]	9.44 × 10-06	1.89 [1.52-2.34]	7.33 × 10-09	2 [1.66-2.41]	6.02 × 10-13	18	0.27

## Sheet: Supl File 1e
		START		BiB		Meta-analysis
Dependent Variable	Interaction term	Beta/OR [95%CI] a	P interaction	Beta/OR [95%CI] a	P interaction	Beta/OR [95%CI] a	P interaction	I2	QE P-value
GDM (South Asian-specific definition)	PRS × Age	0.99 [0.95-1.03]	0.53	1 [0.98-1.02]	0.83	1 [0.98-1.01]	0.66	0	0.62
	PRS × BMI	0.99 [0.96-1.03]	0.62	1 [0.98-1.01]	0.58	0.99 [0.98-1.01]	0.48	0	0.83
	PRS × Born in South Asia	0.71 [0.39-1.26]	0.26	0.96 [0.8-1.15]	0.64	0.93 [0.79-1.11]	0.43	0	0.35
	PRS × Parental history of T2D	0.82 [0.59-1.14]	0.23	0.99 [0.82-1.19]	0.88	0.94 [0.8-1.11]	0.47	0	0.33
	PRS × Parity	0.91 [0.75-1.1]	0.32	0.99 [0.93-1.04]	0.61	0.98 [0.93-1.03]	0.44	0	0.41
	PRS × Education level	1.02 [0.88-1.19]	0.77	0.95 [0.88-1.02]	0.17	0.96 [0.9-1.03]	0.27	0	0.38
	PRS × Low diet quality	1.27 [0.89-1.85]	0.2	-	-	-	-	-	-

## Sheet: Supl File 1f
		START		BiB
Outcome	Subgroup	Beta/OR [95%CI] a	P-value	Beta/OR [95%CI] a	P-value
Fasting glucose	BMI – Tertile 1	0.09 [0.02 – 0.16]	0.01	0.04 [0.02 – 0.07]	2.38 × 10-04
	BMI – Tertile 2	0.14 [0.07 – 0.21]	0.0002	0.08 [0.05 – 0.12]	1.79 × 10-07
	BMI – Tertile 3	0.04 [-0.03 – 0.11]	0.27	0.12 [0.07 – 0.17]	2.9 × 10-07
	Born in South Asia: Yes	0.07 [0.03 – 0.11]	0.001	0.1 [0.07 – 0.13]	8.54 × 10-13
	Born in South Asia: No	0.22 [0.08 – 0.36]	0.002	0.07 [0.04 – 0.10]	4.72 × 10-06
	Low diet quality	0.17 [0.10 – 0.24]	1.05 × 10-06	-	-
	Medium to high quality diet	0.05 [0.00 - 0.09]	0.07	-	-
GDM (IADPSG)	BMI – Tertile 1	1.82 [1.21 - 2.82]	0.005	1.95 [ 1.47 – 2.60]	4.63 × 10-06
	BMI – Tertile 2	1.67 [1.24 – 2.31]	0.001	1.49 [1.23 – 1.81]	4.59 × 10-05
	BMI – Tertile 3	1.54 [1.16 – 2.08]	0.004	1.26 [1.08 – 1.47]	2.77 × 10-03
